# Supplementary material
Source: publisher figshare collection journal article supplement (https://acs.figshare.com/ndownloader/files/6003171)
Supplement: Supplementary file 1 [file 6003171]

---

## SUPPORTING INFORMATION

---

### Stabilization of Calcium Hydride Complexes by Fine-tuning of Amidinate Ligands

Andrea Causero, Gerd Ballmann, Jürgen Pahl, Harmen Zijlstra, Christian Färber and Sjoerd Harder\*

*Inorganic and Organometallic Chemistry, Friedrich-Alexander-Universität Erlangen-Nürnberg, Egerlandstraße 1, 91058 Erlangen, Germany.*

| Contents                                                                                                                                                      | Page |
|---------------------------------------------------------------------------------------------------------------------------------------------------------------|------|
| 1. Crystal structures                                                                                                                                         | 2    |
| 2. Ligand syntheses: $\text{NpAm}^{\text{DIPP}}\text{H}$ , $\text{AdAm}^{\text{DIPP}}\text{H}$                                                                | 20   |
| 3. Complex syntheses: $(t\text{BuAm}^{\text{Mes}})_2\text{Ca}\cdot\text{Et}_2\text{O}$ , $(\text{MeAm}^{\text{DIPP}})[\text{N}(\text{SiMe}_3)_2]_2\text{CaK}$ | 22   |
| 4. Selected $^1\text{H}$ NMR spectra                                                                                                                          | 23   |
| References                                                                                                                                                    | 45   |

## 1. Crystal structures

### Experimental

All crystal structures have been measured on a SuperNova (Agilent) diffractometer with dual Cu and Mo microfocus sources and an Atlas S2 detector. Crystals were covered in paraffin oil, mounted on a flexible MiTeGen microloop and immediately transferred to a cold N<sub>2</sub> stream of 100 K. Structures were determined using Olex2,<sup>1</sup> ShelXT<sup>2</sup> for the structure solution by Direct Methods and ShelXL<sup>3</sup> for least squares refinement. Unless noted otherwise, the hydrogen atoms have been placed at idealized calculated positions and were refined isotropically using a riding model. In case special methods were used, the specific details of the refinement are given separately.

## Crystal structure of AdAm<sup>DIPP</sup>CaN(SiMe<sub>3</sub>)<sub>2</sub>

|                                             |                                                                  |
|---------------------------------------------|------------------------------------------------------------------|
| Identification code                         | hasj160303a                                                      |
| Empirical formula                           | C <sub>41</sub> H <sub>67</sub> CaN <sub>3</sub> Si <sub>2</sub> |
| Formula weight                              | 698.23                                                           |
| Temperature/K                               | 100                                                              |
| Crystal system                              | monoclinic                                                       |
| Space group                                 | P2 <sub>1</sub> /c                                               |
| a/Å                                         | 9.87724(17)                                                      |
| b/Å                                         | 12.3264(2)                                                       |
| c/Å                                         | 33.7986(7)                                                       |
| α/°                                         | 90                                                               |
| β/°                                         | 92.2021(17)                                                      |
| γ/°                                         | 90                                                               |
| Volume/Å <sup>3</sup>                       | 4111.98(14)                                                      |
| Z                                           | 4                                                                |
| ρ <sub>calc</sub> /g/cm <sup>3</sup>        | 1.128                                                            |
| μ/mm <sup>-1</sup>                          | 2.090                                                            |
| F(000)                                      | 1528.0                                                           |
| Crystal size/mm <sup>3</sup>                | 0.1652 × 0.143 × 0.1011                                          |
| Radiation                                   | CuKα (λ = 1.54184)                                               |
| 2θ range for data collection/°              | 7.634 to 136.236                                                 |
| Index ranges                                | -10 ≤ h ≤ 11, -14 ≤ k ≤ 14, -40 ≤ l ≤ 37                         |
| Reflections collected                       | 14210                                                            |
| Independent reflections                     | 7446 [R <sub>int</sub> = 0.0394, R <sub>sigma</sub> = 0.0508]    |
| Data/restraints/parameters                  | 7446/0/438                                                       |
| Goodness-of-fit on F <sup>2</sup>           | 1.039                                                            |
| Final R indexes [I ≥ 2σ (I)]                | R <sub>1</sub> = 0.0511, wR <sub>2</sub> = 0.1346                |
| Final R indexes [all data]                  | R <sub>1</sub> = 0.0568, wR <sub>2</sub> = 0.1404                |
| Largest diff. peak/hole / e Å <sup>-3</sup> | 0.70/-0.41                                                       |

## Crystal structure of $t\text{BuAm}^{\text{DIPP}}\text{CaN}(\text{SiMe}_3)_2\cdot\text{Et}_2\text{O}$

The crystal was twinned over two domains and has been measured as such. The structure was refined using the data from both domains (HKLf5).

|                                                |                                                                    |
|------------------------------------------------|--------------------------------------------------------------------|
| Identification code                            | hasj160321a_twin1_hklf5                                            |
| Empirical formula                              | $\text{C}_{39}\text{H}_{71}\text{CaN}_3\text{OSi}_2$               |
| Formula weight                                 | 694.24                                                             |
| Temperature/K                                  | 100                                                                |
| Crystal system                                 | triclinic                                                          |
| Space group                                    | P-1                                                                |
| a/Å                                            | 10.6373(4)                                                         |
| b/Å                                            | 12.4259(3)                                                         |
| c/Å                                            | 16.4223(3)                                                         |
| $\alpha/^\circ$                                | 90.146(2)                                                          |
| $\beta/^\circ$                                 | 92.606(2)                                                          |
| $\gamma/^\circ$                                | 98.163(3)                                                          |
| Volume/Å <sup>3</sup>                          | 2146.36(10)                                                        |
| Z                                              | 2                                                                  |
| $\rho_{\text{calc}}/\text{g}/\text{cm}^3$      | 1.074                                                              |
| $\mu/\text{mm}^{-1}$                           | 2.014                                                              |
| F(000)                                         | 764.0                                                              |
| Crystal size/mm <sup>3</sup>                   | $0.3255 \times 0.1707 \times 0.1241$                               |
| Radiation                                      | CuK $\alpha$ ( $\lambda = 1.54184$ )                               |
| 2 $\theta$ range for data collection/ $^\circ$ | 7.188 to 147.672                                                   |
| Index ranges                                   | $-13 \leq h \leq 13$ , $-15 \leq k \leq 15$ , $-20 \leq l \leq 20$ |
| Reflections collected                          | 16049                                                              |
| Independent reflections                        | 16049 [ $R_{\text{int}} = -$ , $R_{\text{sigma}} = 0.0211$ ]       |
| Data/restraints/parameters                     | 16049/0/434                                                        |
| Goodness-of-fit on $F^2$                       | 1.078                                                              |
| Final R indexes [ $ I  \geq 2\sigma(I)$ ]      | $R_1 = 0.0384$ , $wR_2 = 0.1088$                                   |
| Final R indexes [all data]                     | $R_1 = 0.0426$ , $wR_2 = 0.1109$                                   |
| Largest diff. peak/hole / e Å <sup>-3</sup>    | 0.75/-0.32                                                         |

## Crystal structure of $\text{NpAm}^{\text{DIPP}}\text{CaN}(\text{SiMe}_3)_2\cdot\text{Et}_2\text{O}$

Disorder of two *i*Pr-groups was refined as two positions with an approximate ration of 75:25. The coordinated ether molecule has also 2 disordered positions each with an approximate ration of 75:25. The less occupied part of the ether molecule was modeled with Rigid Bond (RIGU) Restraints.<sup>4</sup> Additionally part of the disordered moiety was refined with equal displacement parameters (EADP). A result of the disordered  $\text{Et}_2\text{O}$  molecule is a short hydrogen distance of 1.91 Å between a  $\text{SiMe}_3$  moiety of the adjacent unit cell and the less occupied part of the disorder.

|                                               |                                                               |
|-----------------------------------------------|---------------------------------------------------------------|
| Identification code                           | hasj151021a                                                   |
| Empirical formula                             | $\text{C}_{40}\text{H}_{73}\text{CaN}_3\text{OSi}_2$          |
| Formula weight                                | 708.27                                                        |
| Temperature/K                                 | 100                                                           |
| Crystal system                                | monoclinic                                                    |
| Space group                                   | $\text{P2}_1/\text{c}$                                        |
| $a/\text{\AA}$                                | 14.7482(7)                                                    |
| $b/\text{\AA}$                                | 18.0397(7)                                                    |
| $c/\text{\AA}$                                | 16.8077(7)                                                    |
| $\alpha/^\circ$                               | 90                                                            |
| $\beta/^\circ$                                | 94.156(5)                                                     |
| $\gamma/^\circ$                               | 90                                                            |
| Volume/ $\text{\AA}^3$                        | 4460.0(3)                                                     |
| Z                                             | 4                                                             |
| $\rho_{\text{calc}}/\text{g/cm}^3$            | 1.055                                                         |
| $\mu/\text{mm}^{-1}$                          | 1.947                                                         |
| $F(000)$                                      | 1560.0                                                        |
| Crystal size/ $\text{mm}^3$                   | $0.1961 \times 0.0896 \times 0.0687$                          |
| Crystal color                                 | colorless                                                     |
| Radiation                                     | $\text{CuK}\alpha$ ( $\lambda = 1.54184$ )                    |
| $2\theta$ range for data collection/ $^\circ$ | 6.008 to 136.23                                               |
| Index ranges                                  | $-16 \leq h \leq 17, -21 \leq k \leq 13, -20 \leq l \leq 19$  |
| Reflections collected                         | 14692                                                         |
| Independent reflections                       | 8068 [ $R_{\text{int}} = 0.0632, R_{\text{sigma}} = 0.0713$ ] |
| Data/restraints/parameters                    | 8068/23/518                                                   |
| Goodness-of-fit on $F^2$                      | 1.055                                                         |
| Final R indexes [ $ I  \geq 2\sigma(I)$ ]     | $R_1 = 0.0638, wR_2 = 0.1694$                                 |
| Final R indexes [all data]                    | $R_1 = 0.0737, wR_2 = 0.1944$                                 |
| Largest diff. peak/hole / $\text{e \AA}^{-3}$ | 0.49/-0.90                                                    |

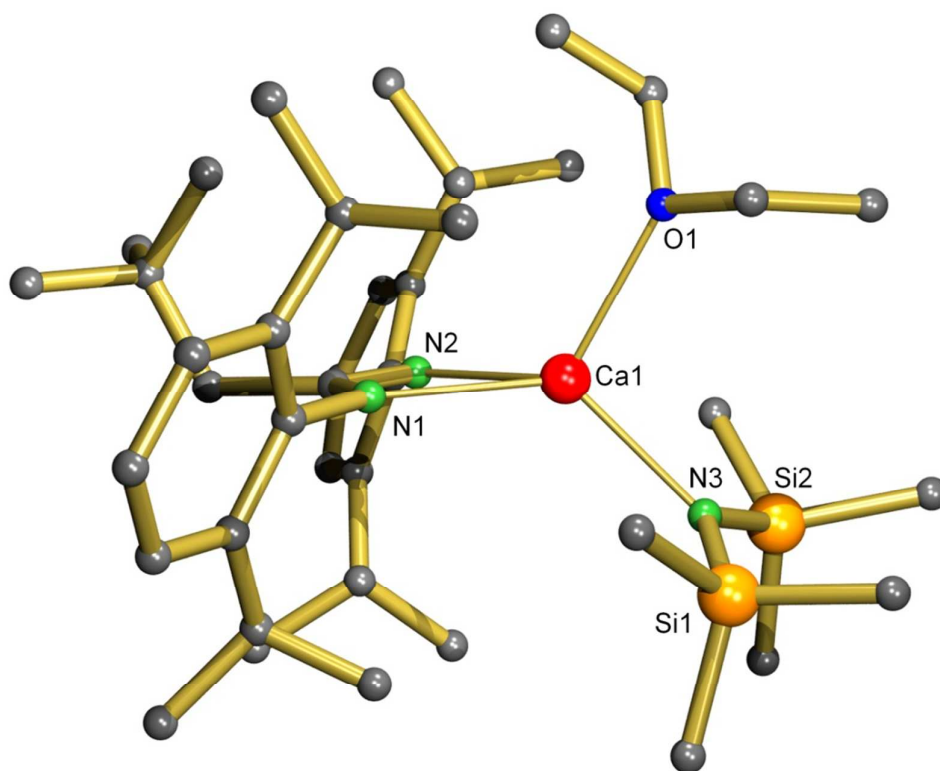

**Figure S1.** Crystal structure of  $\text{NpAm}^{\text{DIPP}}\text{CaN}(\text{SiMe}_3)_2 \cdot \text{Et}_2\text{O}$ .

## Crystal structure of [*p*-TolAm<sup>DIPP</sup>CaN(SiMe<sub>3</sub>)<sub>2</sub>]<sub>2</sub>

The crystal was twinned over two domains and has been measured as such. The structure was refined using the data from both domains (HKL5). The unit cell contains two dimers of which one was disordered with a ratio of 80:20. The less occupied part of the disorder was modeled using idealized geometries for 6-ring (AFIX 66) and Rigid Bond (RIGU) Restraints. Additionally one *i*Pr-group was refined with equal displacement parameters (EADP).<sup>4</sup>

|                                             |                                                                                  |
|---------------------------------------------|----------------------------------------------------------------------------------|
| Identification code                         | HASJ150309C_twin1_hklf5                                                          |
| Empirical formula                           | C <sub>104</sub> H <sub>150</sub> Ca <sub>2</sub> N <sub>6</sub> Si <sub>4</sub> |
| Formula weight                              | 1676.81                                                                          |
| Temperature/K                               | 100                                                                              |
| Crystal system                              | triclinic                                                                        |
| Space group                                 | P-1                                                                              |
| a/Å                                         | 16.3967(2)                                                                       |
| b/Å                                         | 16.4260(3)                                                                       |
| c/Å                                         | 21.1559(4)                                                                       |
| α/°                                         | 110.503(2)                                                                       |
| β/°                                         | 102.6180(10)                                                                     |
| γ/°                                         | 100.0220(10)                                                                     |
| Volume/Å <sup>3</sup>                       | 5008.65(16)                                                                      |
| Z                                           | 2                                                                                |
| ρ <sub>calc</sub> /g/cm <sup>3</sup>        | 1.112                                                                            |
| μ/mm <sup>-1</sup>                          | 1.796                                                                            |
| F(000)                                      | 1824.0                                                                           |
| Crystal size/mm <sup>3</sup>                | 0.426 × 0.137 × 0.1309                                                           |
| Crystal color                               | colorless                                                                        |
| Radiation                                   | CuKα (λ = 1.54184)                                                               |
| 2θ range for data collection/°              | 5.744 to 136.434                                                                 |
| Index ranges                                | -19 ≤ h ≤ 19, -19 ≤ k ≤ 19, -25 ≤ l ≤ 25                                         |
| Reflections collected                       | 32796                                                                            |
| Independent reflections                     | 32796 [R <sub>int</sub> = -, R <sub>sigma</sub> = 0.0157]                        |
| Data/restraints/parameters                  | 32796/191/1284                                                                   |
| Goodness-of-fit on F <sup>2</sup>           | 1.068                                                                            |
| Final R indexes [I ≥ 2σ(I)]                 | R <sub>1</sub> = 0.0594, wR <sub>2</sub> = 0.1689                                |
| Final R indexes [all data]                  | R <sub>1</sub> = 0.0628, wR <sub>2</sub> = 0.1719                                |
| Largest diff. peak/hole / e Å <sup>-3</sup> | 0.86/-0.51                                                                       |

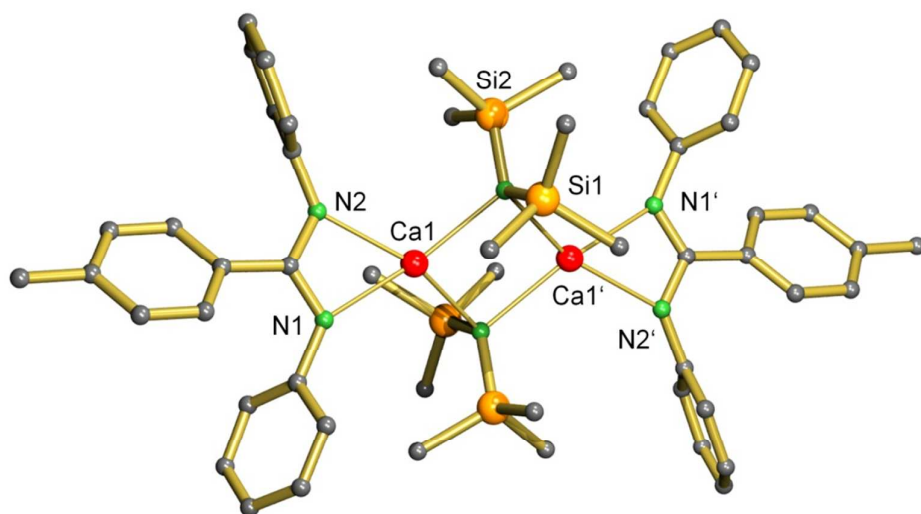

**Figure S2.** Crystal structure of  $[p\text{-TolAm}^{\text{DIPP}}\text{CaN}(\text{SiMe}_3)_2]_2$ ; iPr substituents and H's omitted for clarity. Only one of the two independent dimers is shown (the other dimer is disordered).



## Crystal structure of [MeAm<sup>DIPP</sup>CaN(SiMe<sub>3</sub>)<sub>2</sub>]<sub>2</sub>

Solvent accessible voids contain disordered solvent. A satisfactory disorder model for the solvent was not found, and therefore the OLEX2 Solvent Mask routine (similar to PLATON/SQUEEZE) was used to mask out the disordered electron density.<sup>5</sup> A total void of 1004 Å<sup>3</sup> per unit cell was filled with 339 e<sup>-</sup>.

|                                             |                                                                                 |
|---------------------------------------------|---------------------------------------------------------------------------------|
| Identification code                         | hasj160412a                                                                     |
| Empirical formula                           | C <sub>64</sub> H <sub>110</sub> Ca <sub>2</sub> N <sub>6</sub> Si <sub>4</sub> |
| Formula weight                              | 1156.09                                                                         |
| Temperature/K                               | 100                                                                             |
| Crystal system                              | triclinic                                                                       |
| Space group                                 | P-1                                                                             |
| a/Å                                         | 11.78345(19)                                                                    |
| b/Å                                         | 15.5905(2)                                                                      |
| c/Å                                         | 23.5944(4)                                                                      |
| α/°                                         | 102.6714(13)                                                                    |
| β/°                                         | 94.2421(13)                                                                     |
| γ/°                                         | 106.0615(14)                                                                    |
| Volume/Å <sup>3</sup>                       | 4021.75(11)                                                                     |
| Z                                           | 2                                                                               |
| ρ <sub>calc</sub> /g/cm <sup>3</sup>        | 0.955                                                                           |
| μ/mm <sup>-1</sup>                          | 2.056                                                                           |
| F(000)                                      | 1264.0                                                                          |
| Crystal size/mm <sup>3</sup>                | 0.3767 × 0.244 × 0.1763                                                         |
| Radiation                                   | CuKα (λ = 1.54184)                                                              |
| 2θ range for data collection/°              | 8.004 to 136.228                                                                |
| Index ranges                                | -14 ≤ h ≤ 14, -18 ≤ k ≤ 14, -28 ≤ l ≤ 28                                        |
| Reflections collected                       | 43916                                                                           |
| Independent reflections                     | 14614 [R <sub>int</sub> = 0.0364, R <sub>sigma</sub> = 0.0342]                  |
| Data/restraints/parameters                  | 14614/0/715                                                                     |
| Goodness-of-fit on F <sup>2</sup>           | 1.022                                                                           |
| Final R indexes [I > 2σ(I)]                 | R <sub>1</sub> = 0.0403, wR <sub>2</sub> = 0.1109                               |
| Final R indexes [all data]                  | R <sub>1</sub> = 0.0435, wR <sub>2</sub> = 0.1136                               |
| Largest diff. peak/hole / e Å <sup>-3</sup> | 0.47/-0.33                                                                      |

### Crystal structure of $(t\text{BuAm}^{\text{DIPP}}\text{CaH})_2$

Measurement of the crystal using standard procedures gave the following unit cell:

$a = 10.5832(4) \text{ \AA}$ ,  $b = 10.5905(4) \text{ \AA}$ ,  $c = 14.2888(5) \text{ \AA}$ ,  $\alpha = 109.789(4)^\circ$ ,  $\beta = 94.757(3)^\circ$ ,  $\gamma = 109.004(4)^\circ$ ,  $V = 1390.8(5) \text{ \AA}^3$ . Triclinic, P-1, one centrosymmetric dimer per unit cell.

Although the structure could be solved, refinement gave poor  $R$ -values and thermal displacement factors. It became clear from weaker intermittent satellite reflexes that the structure is modulated.

The structure was transformed to a super cell with following parameters:

$a = 19.7248(6) \text{ \AA}$ ,  $b = 20.4652(9) \text{ \AA}$ ,  $c = 26.5472(8) \text{ \AA}$ ,  $\alpha = 112.570(4)^\circ$ ,  $\beta = 93.971(2)^\circ$ ,  $\gamma = 96.699(2)^\circ$ ,  $V = 9752(1) \text{ \AA}^3$ . Triclinic, P-1, seven dimers per unit cell.

Refinement in the super cell gave a more reliable structure refinement but due to many very weak reflexes, refinement as a modulated structure should be preferred. Since the structure of  $(t\text{BuAm}^{\text{DIPP}}\text{CaH})_2$  is similar to that of  $(\text{AdAm}^{\text{DIPP}}\text{CaH})_2$ , which could be determined without crystallographic artefacts, we report here only data for the latter.

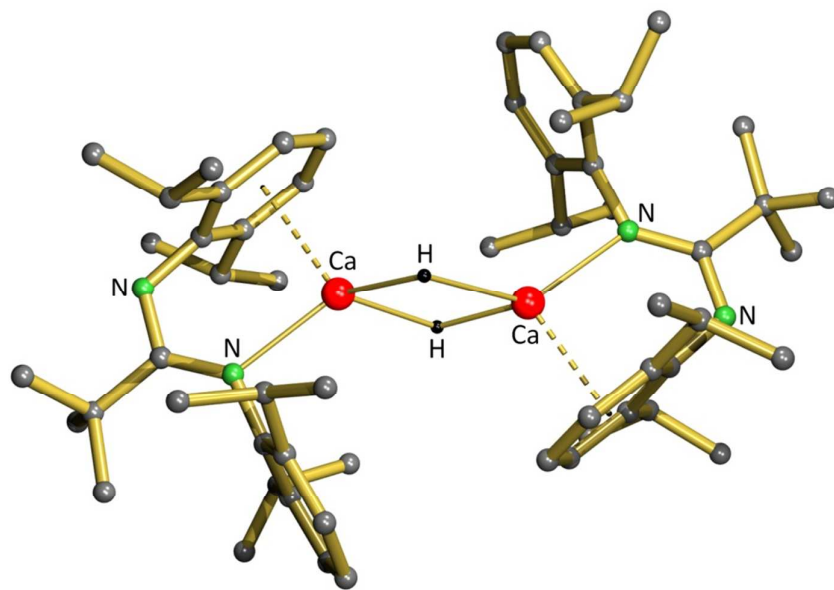

**Figure S3.** Crystal structure of  $(t\text{BuAm}^{\text{DIPP}}\text{CaH})_2$  solved in a super cell. Only one of the 3.5 dimers in the asymmetric unit is shown. Due to modulation problems only connectivity is shown.

## Crystal structure of (AdAm<sup>DIPP</sup>CaH)<sub>2</sub>

The hydridic hydrogen atoms could be localized in the difference Fourier map and were refined isotropically. At two positions two co-crystallized benzene molecules could be observed which were in each case disordered over two position with a ratio of approximately 1:1. Due to substantial differences in C-C bond lengths of the disordered benzene molecules an idealized geometry was used (AFIX 66).<sup>4</sup>

|                                             |                                                                 |
|---------------------------------------------|-----------------------------------------------------------------|
| Identification code                         | hasj151204b                                                     |
| Empirical formula                           | C <sub>94</sub> H <sub>124</sub> Ca <sub>2</sub> N <sub>4</sub> |
| Formula weight                              | 1390.12                                                         |
| Temperature/K                               | 100.00(10)                                                      |
| Crystal system                              | triclinic                                                       |
| Space group                                 | P-1                                                             |
| a/Å                                         | 10.4550(2)                                                      |
| b/Å                                         | 10.5225(2)                                                      |
| c/Å                                         | 19.8508(3)                                                      |
| α/°                                         | 83.3598(15)                                                     |
| β/°                                         | 87.9438(15)                                                     |
| γ/°                                         | 69.2211(18)                                                     |
| Volume/Å <sup>3</sup>                       | 2028.06(7)                                                      |
| Z                                           | 1                                                               |
| ρ <sub>calc</sub> /g/cm <sup>3</sup>        | 1.138                                                           |
| μ/mm <sup>-1</sup>                          | 1.569                                                           |
| F(000)                                      | 756.0                                                           |
| Crystal size/mm <sup>3</sup>                | 0.4655 × 0.1638 × 0.1088                                        |
| Crystal color                               | colorless                                                       |
| Radiation                                   | CuKα (λ = 1.54184)                                              |
| 2θ range for data collection/°              | 8.97 to 136.186                                                 |
| Index ranges                                | -12 ≤ h ≤ 12, -12 ≤ k ≤ 12, -23 ≤ l ≤ 23                        |
| Reflections collected                       | 41056                                                           |
| Independent reflections                     | 7410 [R <sub>int</sub> = 0.0728, R <sub>sigma</sub> = 0.0371]   |
| Data/restraints/parameters                  | 7410/36/537                                                     |
| Goodness-of-fit on F <sup>2</sup>           | 1.022                                                           |
| Final R indexes [I > 2σ(I)]                 | R <sub>1</sub> = 0.0569, wR <sub>2</sub> = 0.1546               |
| Final R indexes [all data]                  | R <sub>1</sub> = 0.0596, wR <sub>2</sub> = 0.1570               |
| Largest diff. peak/hole / e Å <sup>-3</sup> | 0.72/-0.57                                                      |

## Crystal structure of (tBuAm<sup>DIPP</sup>CaH)<sub>3</sub>·(Et<sub>2</sub>O)<sub>2</sub>

Solvent accessible voids contain disordered solvent. A satisfactory disorder model for the solvent was not found, and therefore the OLEX2 Solvent Mask routine (similar to PLATON/SQUEEZE) was used to mask out the disordered electron density.<sup>5</sup> A total void of 1696 Å<sup>3</sup> per unit cell was filled with 463 e<sup>-</sup>.

|                                             |                                                                                |
|---------------------------------------------|--------------------------------------------------------------------------------|
| Identification code                         | hasj150424a                                                                    |
| Empirical formula                           | C <sub>95</sub> H <sub>152</sub> Ca <sub>3</sub> N <sub>6</sub> O <sub>6</sub> |
| Formula weight                              | 1530.48                                                                        |
| Temperature/K                               | 100.00(10)                                                                     |
| Crystal system                              | monoclinic                                                                     |
| Space group                                 | P2 <sub>1</sub> /c                                                             |
| a/Å                                         | 27.3041(2)                                                                     |
| b/Å                                         | 12.4085(1)                                                                     |
| c/Å                                         | 58.1368(3)                                                                     |
| α/°                                         | 90                                                                             |
| β/°                                         | 94.455(1)                                                                      |
| γ/°                                         | 90                                                                             |
| Volume/Å <sup>3</sup>                       | 19637.5(2)(7)                                                                  |
| Z                                           | 8                                                                              |
| ρ <sub>calc</sub> /g/cm <sup>3</sup>        | 1.035                                                                          |
| μ/mm <sup>-1</sup>                          | 1.800                                                                          |
| F(000)                                      | 6720                                                                           |
| Crystal size/mm <sup>3</sup>                | 0.12 × 0.08 × 0.04                                                             |
| Crystal color                               | colorless                                                                      |
| Radiation                                   | CuKα (λ = 1.54184)                                                             |
| 2θ range for data collection/°              | 6.0 to 147.4                                                                   |
| Index ranges                                | -30 ≤ h ≤ 33, -14 ≤ k ≤ 14, -72 ≤ l ≤ 68                                       |
| Reflections collected                       | 115425                                                                         |
| Independent reflections                     | 38340 [R <sub>int</sub> = 0.047, R <sub>sigma</sub> = 0.0368]                  |
| Data/restraints/parameters                  | 38340/0/1933                                                                   |
| Goodness-of-fit on F <sup>2</sup>           | 1.03                                                                           |
| Final R indexes [I ≥ 2σ (I)]                | R <sub>1</sub> = 0.0510, wR <sub>2</sub> = 0.1409                              |
| Largest diff. peak/hole / e Å <sup>-3</sup> | 1.08/-0.98                                                                     |

## Crystal structure of (AdAm<sup>DIPP</sup>CaH)<sub>3</sub>·(THF)<sub>2</sub>

The hydridic hydrogen atoms could be localized in the difference Fourier map and were refined isotropically. Solvent accessible voids contain disordered solvent. A satisfactory disorder model for the solvent was not found, and therefore the OLEX2 Solvent Mask routine (similar to PLATON/SQUEEZE) was used to mask out the disordered electron density.<sup>5</sup> A total void of 1318 Å<sup>3</sup> per unit cell was filled with 345 e<sup>-</sup>.

|                                             |                                                                                 |
|---------------------------------------------|---------------------------------------------------------------------------------|
| Identification code                         | hasj151127b                                                                     |
| Empirical formula                           | C <sub>119</sub> H <sub>180</sub> Ca <sub>3</sub> N <sub>6</sub> O <sub>2</sub> |
| Formula weight                              | 1846.92                                                                         |
| Temperature/K                               | 100                                                                             |
| Crystal system                              | triclinic                                                                       |
| Space group                                 | P-1                                                                             |
| a/Å                                         | 15.1967(2)                                                                      |
| b/Å                                         | 18.2301(3)                                                                      |
| c/Å                                         | 25.8609(4)                                                                      |
| α/°                                         | 92.8035(13)                                                                     |
| β/°                                         | 101.6317(12)                                                                    |
| γ/°                                         | 114.0730(15)                                                                    |
| Volume/Å <sup>3</sup>                       | 6337.72(18)                                                                     |
| Z                                           | 2                                                                               |
| ρ <sub>calc</sub> /g/cm <sup>3</sup>        | 0.968                                                                           |
| μ/mm <sup>-1</sup>                          | 1.463                                                                           |
| F(000)                                      | 2024.0                                                                          |
| Crystal size/mm <sup>3</sup>                | 0.3117 × 0.2182 × 0.1941                                                        |
| Radiation                                   | CuKα (λ = 1.54184)                                                              |
| 2θ range for data collection/°              | 6.468 to 136.236                                                                |
| Index ranges                                | -18 ≤ h ≤ 18, -21 ≤ k ≤ 19, -30 ≤ l ≤ 31                                        |
| Reflections collected                       | 39256                                                                           |
| Independent reflections                     | 22879 [R <sub>int</sub> = 0.0317, R <sub>sigma</sub> = 0.0447]                  |
| Data/restraints/parameters                  | 22879/0/1209                                                                    |
| Goodness-of-fit on F <sup>2</sup>           | 1.070                                                                           |
| Final R indexes [I ≥ 2σ (I)]                | R <sub>1</sub> = 0.0552, wR <sub>2</sub> = 0.1541                               |
| Final R indexes [all data]                  | R <sub>1</sub> = 0.0631, wR <sub>2</sub> = 0.1623                               |
| Largest diff. peak/hole / e Å <sup>-3</sup> | 0.89/-0.51                                                                      |

## Crystal structure of (tBuAm<sup>Mes</sup>)<sub>2</sub>Ca·Et<sub>2</sub>O

The two tBu-backbone substituents are rotationally disordered over two positions with an approximate ratio of 85:15. This was treated using an appropriate disorder model.

|                                             |                                                               |
|---------------------------------------------|---------------------------------------------------------------|
| Identification code                         | hasj151102a                                                   |
| Empirical formula                           | C <sub>50</sub> H <sub>72</sub> CaN <sub>4</sub> O            |
| Formula weight                              | 785.19                                                        |
| Temperature/K                               | 100                                                           |
| Crystal system                              | monoclinic                                                    |
| Space group                                 | P2 <sub>1</sub> /n                                            |
| a/Å                                         | 12.12062(13)                                                  |
| b/Å                                         | 16.59171(16)                                                  |
| c/Å                                         | 22.9746(2)                                                    |
| α/°                                         | 90                                                            |
| β/°                                         | 90.4699(9)                                                    |
| γ/°                                         | 90                                                            |
| Volume/Å <sup>3</sup>                       | 4620.09(8)                                                    |
| Z                                           | 4                                                             |
| ρ <sub>calc</sub> /g/cm <sup>3</sup>        | 1.129                                                         |
| μ/mm <sup>-1</sup>                          | 1.458                                                         |
| F(000)                                      | 1712.0                                                        |
| Crystal size/mm <sup>3</sup>                | 0.4097 × 0.3125 × 0.1885                                      |
| Radiation                                   | CuKα (λ = 1.54184)                                            |
| 2θ range for data collection/°              | 6.572 to 136.232                                              |
| Index ranges                                | -14 ≤ h ≤ 14, -17 ≤ k ≤ 19, -27 ≤ l ≤ 27                      |
| Reflections collected                       | 49263                                                         |
| Independent reflections                     | 8433 [R <sub>int</sub> = 0.0405, R <sub>sigma</sub> = 0.0220] |
| Data/restraints/parameters                  | 8433/0/587                                                    |
| Goodness-of-fit on F <sup>2</sup>           | 1.040                                                         |
| Final R indexes [I ≥ 2σ (I)]                | R <sub>1</sub> = 0.0363, wR <sub>2</sub> = 0.0991             |
| Final R indexes [all data]                  | R <sub>1</sub> = 0.0376, wR <sub>2</sub> = 0.1004             |
| Largest diff. peak/hole / e Å <sup>-3</sup> | 0.24/-0.19                                                    |

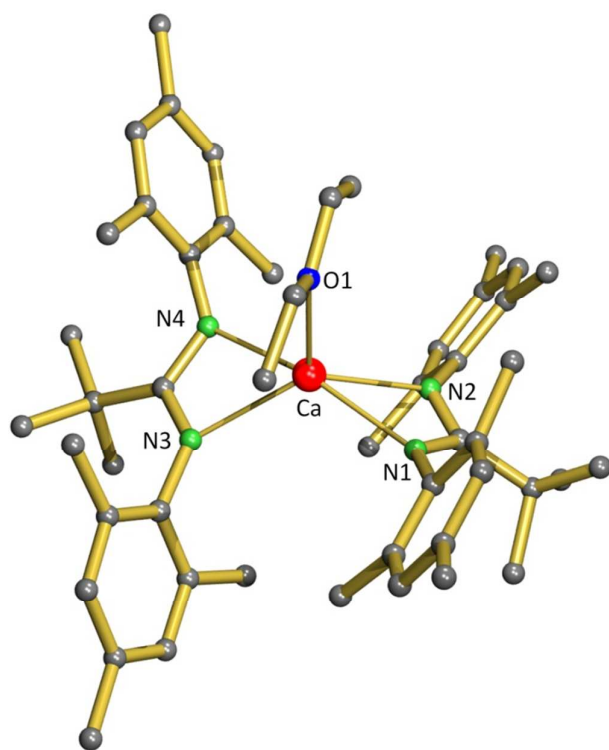

**Figure S4.** Crystal structure of  $(t\text{BuAm}^{\text{Mes}})_2\text{Ca}\cdot\text{Et}_2\text{O}$ . Selected bond distances (Å) and angles (°): Ca-N1 2.406(1), Ca-N2 2.397(1), Ca-N3 2.401(1), Ca-N4 2.410(1), Ca-O1 2.407(1), N1-Ca-N2 54.89(4), N3-Ca-N4 55.15(4).

# Crystal structure of (MeAm<sup>DIPP</sup>)[N(SiMe<sub>3</sub>)<sub>2</sub>]<sub>2</sub>CaK

|                                             |                                                                   |
|---------------------------------------------|-------------------------------------------------------------------|
| Identification code                         | hasj160404b                                                       |
| Empirical formula                           | C <sub>38</sub> H <sub>73</sub> CaKN <sub>4</sub> Si <sub>4</sub> |
| Formula weight                              | 777.54                                                            |
| Temperature/K                               | 100                                                               |
| Crystal system                              | monoclinic                                                        |
| Space group                                 | P2 <sub>1</sub> /c                                                |
| a/Å                                         | 18.9149(2)                                                        |
| b/Å                                         | 11.58948(14)                                                      |
| c/Å                                         | 21.6672(3)                                                        |
| α/°                                         | 90                                                                |
| β/°                                         | 99.4158(12)                                                       |
| γ/°                                         | 90                                                                |
| Volume/Å <sup>3</sup>                       | 4685.75(10)                                                       |
| Z                                           | 4                                                                 |
| ρ <sub>calc</sub> /g/cm <sup>3</sup>        | 1.102                                                             |
| μ/mm <sup>-1</sup>                          | 3.136                                                             |
| F(000)                                      | 1696.0                                                            |
| Crystal size/mm <sup>3</sup>                | 0.3174 × 0.082 × 0.0604                                           |
| Radiation                                   | CuKα (λ = 1.54184)                                                |
| 2θ range for data collection/°              | 8.272 to 136.232                                                  |
| Index ranges                                | -22 ≤ h ≤ 22, -9 ≤ k ≤ 13, -26 ≤ l ≤ 24                           |
| Reflections collected                       | 16064                                                             |
| Independent reflections                     | 8501 [R <sub>int</sub> = 0.0297, R <sub>sigma</sub> = 0.0412]     |
| Data/restraints/parameters                  | 8501/0/454                                                        |
| Goodness-of-fit on F <sup>2</sup>           | 1.026                                                             |
| Final R indexes [I ≥ 2σ (I)]                | R <sub>1</sub> = 0.0370, wR <sub>2</sub> = 0.0976                 |
| Final R indexes [all data]                  | R <sub>1</sub> = 0.0419, wR <sub>2</sub> = 0.1021                 |
| Largest diff. peak/hole / e Å <sup>-3</sup> | 0.44/-0.45                                                        |



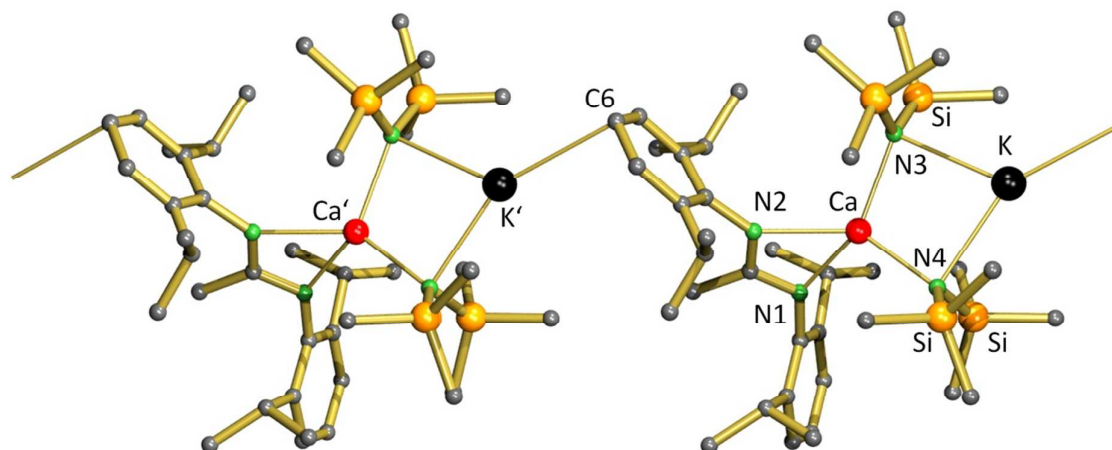

**Figure S5.** Crystal structure of  $(\text{MeAm}^{\text{DIPP}})[\text{N}(\text{SiMe}_3)_2]_2\text{CaK}$ . Selected bond distances (Å) and angles (°): Ca-N1 2.397(1), Ca-N2 2.408(1), Ca-N3 2.377(1), Ca-N4 2.375(1), K-N3 2.871(1), K-N4 2.997(1), C6-K' 3.106(2), N1-Ca-N2 56.32(5), N3-Ca-N4 105.02(5), N3-K-N4 79.94(4).

# Crystal structure of (AdAm<sup>DIPP</sup>)Ca[N(SiMe<sub>3</sub>)<sub>2</sub>]<sub>2</sub>·THF

|                                             |                                                                                                 |
|---------------------------------------------|-------------------------------------------------------------------------------------------------|
| Identification code                         | hasj160706                                                                                      |
| Empirical formula                           | C <sub>144</sub> H <sub>234</sub> Ca <sub>3</sub> N <sub>9</sub> O <sub>3</sub> Si <sub>6</sub> |
| Formula weight                              | 2428.29                                                                                         |
| Temperature/K                               | 100                                                                                             |
| Crystal system                              | monoclinic                                                                                      |
| Space group                                 | P2 <sub>1</sub> /c                                                                              |
| a/Å                                         | 31.2740(5)                                                                                      |
| b/Å                                         | 22.9849(2)                                                                                      |
| c/Å                                         | 21.3045(2)                                                                                      |
| α/°                                         | 90                                                                                              |
| β/°                                         | 108.0355(13)                                                                                    |
| γ/°                                         | 90                                                                                              |
| Volume/Å <sup>3</sup>                       | 14561.8(3)                                                                                      |
| Z                                           | 4                                                                                               |
| ρ <sub>calc</sub> /g/cm <sup>3</sup>        | 1.108                                                                                           |
| μ/mm <sup>-1</sup>                          | 1.848                                                                                           |
| F(000)                                      | 5316.0                                                                                          |
| Crystal size/mm <sup>3</sup>                | 0.33 × 0.20 × 0.33                                                                              |
| Radiation                                   | CuKα (λ = 1.54184)                                                                              |
| 2θ range for data collection/°              | 5.8 to 136.2                                                                                    |
| Index ranges                                | -36 ≤ h ≤ 37, -27 ≤ k ≤ 15, -25 ≤ l ≤ 21                                                        |
| Reflections collected                       | 53201                                                                                           |
| Independent reflections                     | 26403 [R <sub>int</sub> = 0.031, R <sub>sigma</sub> = 0.043]                                    |
| Data/restraints/parameters                  | 26403/0/1528                                                                                    |
| Goodness-of-fit on F <sup>2</sup>           | 1.03                                                                                            |
| Final R indexes [I ≥ 2σ (I)]                | R <sub>1</sub> = 0.0437, wR <sub>2</sub> = 0.1177                                               |
| Largest diff. peak/hole / e Å <sup>-3</sup> | 0.98/-0.40                                                                                      |

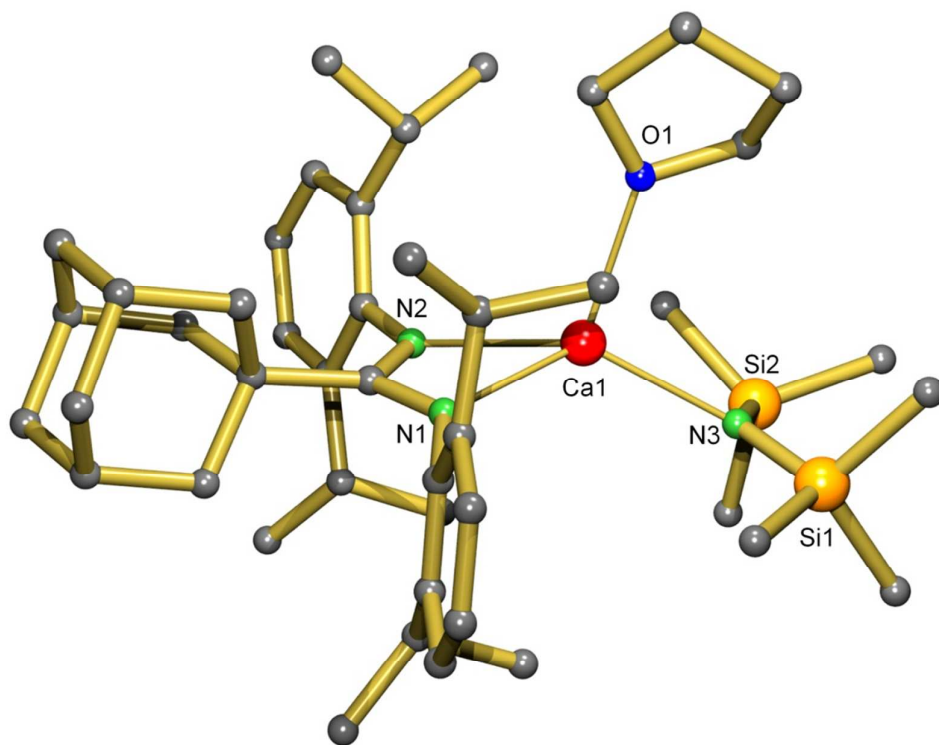

**Figure S6.** Crystal structure of  $t\text{BuAm}^{\text{DIPP}}\text{Ca}[\text{N}(\text{SiMe}_3)_2]_2 \cdot \text{THF}$ . Selected bond distances (Å) and angles (°) (average values from three independent molecules: Ca-N1 2.327(2), Ca-N2 2.399(2), Ca-N3 2.300(2), Ca-O1 2.348(2), N1-Ca-N2 112.19(1).

## 2. Ligand syntheses: NpAm<sup>DIPP</sup>H, AdAm<sup>DIPP</sup>H

**Synthesis of AdC(O)N(H)DIPP** In a 500ml Schlenk flask, 2,6-diisopropylaniline (4.74 ml, 25.2 mmol) and triethylamine (3.50 ml, 25.2 mmol) were stirred in ethyl acetate (150 ml) under N<sub>2</sub>, and adamantanecarbonyl chloride (5.00 g, 25.2 mmol) was dissolved in 100 ml of ethyl acetate to be added slowly and drop wise. The solution got immediately turbid, and the reaction was placed at 70 °C under reflux conditions for three hours. The suspension was washed with water (3x 200 ml), collected apart and the solvent removed under high vacuum. Yield: 8.52 g, 25.1 mmol, 99.8%. Two stereo-isomers (trans/cis) in a 67/33 ratio were observed. <sup>1</sup>H NMR (400 MHz, CDCl<sub>3</sub>): δ = 1.19 (67%, d, <sup>3</sup>J<sub>HH</sub> = 6.8 Hz, 12H), 1.28 (33%, d, J = 6.8 Hz, 12H), 1.47 – 2.23 (m, 15H), 2.92 (33%, hept, <sup>3</sup>J<sub>HH</sub> = 6.9 Hz, 2H), 3.01 (67%, hept, <sup>3</sup>J<sub>HH</sub> = 6.9 Hz, 2H), 3.74 (s, 1H), 6.81 (t, <sup>3</sup>J<sub>HH</sub> = 7.7 Hz, 1H), 7.04 (33%, d, <sup>3</sup>J<sub>HH</sub> = 7.7 Hz, 2H), 7.16 (67%, d, <sup>3</sup>J<sub>HH</sub> = 7.7 Hz, 2H). <sup>13</sup>C NMR (101 MHz, CDCl<sub>3</sub>): δ = 22.6 (iPr), 23.6 (Ad), 23.68 (Ad), 27.83 (Ad), 28.09 (iPr), 28.41 (Ad), 28.83 (Ad), 36.47 (Ad), 36.71 (Ad), 38.43 (Ad), 39.60 (Ad), 39.71 (Ad), 41.37 (iPr), 118.66 (Ar), 122.92 (Ar), 123.43 (Ar), 128.16 (Ar), 131.58 (Ar), 132.59 (Ar), 146.28 (Ar), 176.75 (CO). Elemental analysis: Calculated for C<sub>23</sub>H<sub>33</sub>NO : C 81.37, H 9.80; Found: C 81.17, H 9.73.

**Synthesis of AdC(Cl)NDIPP** In a 500 ml Schlenk flask AdC(O)N(H)DIPP (6.00 g, 17.7 mmol) was suspended in dry toluene (200 ml), then PCl<sub>5</sub> (3.86 g, 18.6 mmol) was added under N<sub>2</sub> and the reaction was placed at 60°C for 3 days. The solvent was removed under high vacuum and the resulting off white dust was left under high vacuum at 85°C for 2h to remove both byproduct and unreacted PCl<sub>5</sub>, and used without any additional purification. Yield: 6.21 g, 17.35 mmol, 98.2%. <sup>1</sup>H NMR (400 MHz, CDCl<sub>3</sub>): δ = 1.21 (d, <sup>3</sup>J<sub>HH</sub> = 6.8 Hz, 12H, iPr), 1.64 – 2.21 (m, 15H, Ad), 2.76 (d, <sup>3</sup>J<sub>HH</sub> = 6.9 Hz, 2H, hept), 7.08 – 7.22 (m, 3H). <sup>13</sup>C NMR (101 MHz, CDCl<sub>3</sub>): δ 28.45 (iPr), 36.21 (Ad), 36.67 (Ad), 39.16 (Ad), 40.63 (Ad), 45.66 (iPr), 122.98 (Ar), 124.47 (Ar), 136.54 (Ar), 143.40 (Ar), 154.60 (NCCl). Elemental analysis: Calculated for C<sub>23</sub>H<sub>32</sub>ClN: C 77.17, H 9.01; Found: C 77.20, H 9.09.

**Synthesis of AdAm<sup>DIPP</sup>H** In a 500 ml Schlenk flask AdC(Cl)NDIPP (6.21 g, 17.4 mmol) was dissolved in dry toluene (200 ml) and reacted under N<sub>2</sub> with 2,6-diisopropylaniline (3.6 ml, 19.1 mmol) at 110°C under reflux conditions for 5d. The volatiles were removed under high vacuum and the resulting pale pink dust suspended in Et<sub>2</sub>O (400 ml) and then washed with a saturated solution of K<sub>2</sub>CO<sub>3</sub> (250 ml), brine (250 ml) and water (300 ml). The organic phase was collected, dried with MgSO<sub>4</sub> and filtered. The product was obtained pure recrystallizing it from methanol. Yield: 6.15 g, 12.33 mmol, 71%. <sup>1</sup>H NMR (600 MHz, Chloroform-*d*): δ = 0.94 (d, <sup>3</sup>J<sub>HH</sub> = 6.9 Hz, 6H, iPr), 1.18 – 1.40 (m, 18H, iPr), 1.56 – 2.04 (m, 15H, Ad), 3.08 (hept, <sup>3</sup>J<sub>HH</sub> = 6.9 Hz, 2H, iPr), 3.37 (hept, <sup>3</sup>J<sub>HH</sub> = 6.9 Hz, 2H, iPr), 5.17 (bs, 1H), 6.94 – 7.25 (m, 6H, Ar). <sup>13</sup>C NMR (151 MHz, CDCl<sub>3</sub>): δ = 21.70 (iPr), 22.18 (iPr), 24.25 (iPr), 25.97 (iPr), 28.77 (Ad), 36.83 (Ad), 40.99 (Ad), 42.00 (Ad), 122.30 (Ar), 122.78 (Ar), 123.19 (Ar), 128.17 (Ar), 136.18 (Ar), 138.45 (Ar), 144.88 (Ar), 147.58 (Ar), 159.10 (NCN). Elemental analysis: Calculated for C<sub>35</sub>H<sub>50</sub>N<sub>2</sub>: C 84.28, H 10.10, N 5.62; Found: C 84.55, H 10.13, N 5.64.

**Synthesis of NpC(O)N(H)DIPP** In a 500ml Schlenk flask, 2,6-diisopropylaniline (5.60 ml, 29.7 mmol) and triethylamine (4.10 ml, 29.7 mmol) were stirred in ethyl acetate (200 ml) under N<sub>2</sub>. 3,3-dimethylbutyryl chloride (4.00 g, 29.7 mmol) was separately dissolved in ethyl acetate (100 ml) and added drop wise. The solution got immediately turbid, and the reaction was placed at 50 °C for 3h. The suspension was washed with water (3x 200ml), collected apart and

the solvent removed under high vacuum. Yield: 8.15 g, 29.6 mmol, 99.7%.  $^1\text{H}$  NMR (400 MHz, Chloroform-*d*):  $\delta$  = 1.14 (s, 9H, tBu-Np), 1.19 (d,  $^3J_{\text{HH}}$  = 6.9 Hz, 12H, iPr), 2.31 (s, 2H, CH<sub>2</sub>-Np), 3.10 (hept,  $^3J_{\text{HH}}$  = 6.9 Hz, 2H, iPr), 6.60 (s, 1H, NH), 7.12 – 7.31 (m, 3H, Ar).  $^{13}\text{C}$  NMR (101 MHz, CDCl<sub>3</sub>)  $\delta$  23.82, 28.92, 30.08, 31.30, 50.71, 123.51, 128.42, 131.45, 146.38, 171.23.  $^{13}\text{C}$  NMR (101 MHz, CDCl<sub>3</sub>):  $\delta$  = 23.82 (CH<sub>2</sub>-Neopent), 28.92 (iPr), 30.08 (CH<sub>3</sub>-Np), 31.30 (C-Np), 50.71 (iPr), 123.51 (Ar), 128.42 (Ar), 131.45 (Ar), 146.38 (Ar), 171.23 (CO). Elemental analysis: Calculated for C<sub>18</sub>H<sub>29</sub>NO : C 78.49, H 10.61; Found: C 78.36, H 10.55.

**Synthesis of NpC(Cl)NDIPP** In a 500ml Schlenk flask NpC(O)N(H)DIPP (8.15 g, 29.6 mmol) was suspended in dry toluene (150 ml), then PCl<sub>5</sub> (6.47 g, 31.1 mmol) was added under N<sub>2</sub> and the reaction was placed at 60°C for 3 days. The solvent was removed under high vacuum and the resulting off white dust was left under high vacuum at 85°C for 2h to remove both byproduct and unreacted PCl<sub>5</sub>, and used without any additional purification. Yield: 8.15 g, 29.5 mmol, 93.7%.  $^1\text{H}$  NMR (600 MHz, CDCl<sub>3</sub>):  $\delta$  = 1.20 – 1.24 (m, 21H, tBu-Np + iPr), 2.83 (s, 2H, CH<sub>2</sub>-Np), 2.86 (d,  $^3J_{\text{HH}}$  = 6.9 Hz, 2H, iPr), 7.16 – 7.18 (m, 3H, Ar).  $^{13}\text{C}$  NMR (151 MHz, CDCl<sub>3</sub>):  $\delta$  = 23.34 (CH<sub>2</sub>-Neopent), 28.61 (iPr), 29.74 (CH<sub>3</sub>-Neopent), 32.25 (C-Np), 55.84 (iPr), 123.09 (Ar), 124.89 (Ar), 136.86 (Ar), 143.53 (Ar), 168.26 (Ar). Elemental analysis: Calculated for C<sub>18</sub>H<sub>28</sub>ClN: C 73.57, H 9.60, N 4.77; Found: C 73.55, H 9.69, N 4.64.

**Synthesis of NpAm<sup>DIPP</sup>H** In a 500 ml Schlenk flask NpC(Cl)NDIPP (8.66 g, 29.5 mmol) was dissolved in dry toluene (150 ml) and reacted under N<sub>2</sub> with 2,6-diisopropylaniline (5.8 ml, 30.9 mmol) at 110°C under reflux conditions for 3d. The volatiles were removed under high vacuum and the resulting pale yellow dust suspended in Et<sub>2</sub>O (400 ml) and then washed with a saturated solution of K<sub>2</sub>CO<sub>3</sub> (250 ml), brine (250 ml) and water (300 ml). The organic phase was collected, dried with MgSO<sub>4</sub> and filtered. The product was obtained pure recrystallizing it from methanol. Yield: 10.53 g, 24.2 mmol, 82.1%.  $^1\text{H}$  NMR (400 MHz, Chloroform-*d*):  $\delta$  = 0.96 – 1.37 (m, 33H, iPr+tBu-Np), 1.82 – 1.96 (m, 2H, CH<sub>2</sub>-Np), 2.92 – 3.46 (m, 4H, iPr), 5.14 – 5.48 (m, 1H, NH), 6.98 – 7.25 (m, 6H, Ar).  $^{13}\text{C}$  NMR (101 MHz, CDCl<sub>3</sub>):  $\delta$  = 22.14 (CH<sub>3</sub>-Neopent), 23.19 (iPr), 24.85 (iPr), 25.12 (C-Np), 28.27 (iPr), 28.67 (iPr), 29.98 (CH<sub>2</sub>-Neopent), 30.91 (iPr), 43.49 (iPr), 122.62 (Ar), 123.04 (Ar), 123.66 (Ar), 128.11 (Ar), 133.68 (Ar), 138.89 (Ar), 144.53 (Ar), 147.05 (Ar), 153.02 (NCN). Elemental analysis: Calculated for C<sub>30</sub>H<sub>46</sub>N<sub>2</sub>: C 82.89, H 10.67, N 6.44; Found: C 82.94, H 10.70, N 6.48.

### 3. Complex syntheses: $(t\text{BuAm}^{\text{Mes}})_2\text{Ca}\cdot\text{Et}_2\text{O}$ , $(\text{MeAm}^{\text{DIPP}})[\text{N}(\text{SiMe}_3)_2]_2\text{CaK}$

**Synthesis of  $(t\text{BuAm}^{\text{Mes}})_2\text{Ca}\cdot\text{Et}_2\text{O}$**  Attempted preparation of  $t\text{BuAm}^{\text{Mes}}\text{CaN}(\text{SiMe}_3)_2$  according to the routes A and B (Scheme 3b) gave in both cases the homoleptic *bis*-amidinate calcium product. Route A:  $t\text{BuAm}^{\text{Mes}}\text{H}$  (300 mg, 0.89 mmol) and  $\text{KN}(\text{SiMe}_3)_2$  (355 mg, 1.78 mmol) were dissolved in 20 ml of  $\text{Et}_2\text{O}$  and stirred at room temperature for one hour. Then  $\text{CaI}_2$  (262 mg, 0.89 mmol) was added under  $\text{N}_2$  and the slurry was stirred at 40 °C under reflux conditions for two days.  $\text{Et}_2\text{O}$  was removed under vacuum and the product was extracted with 20 ml of hexane. After centrifugation, the hexane phase was separated from the precipitate and concentrated to one fourth of the initial volume. Cooling the solution to -20°C gave the product in the form of small block-like crystals. Yield: 503 mg, 92%. Route B:  $t\text{BuAm}^{\text{Mes}}\text{H}$  (300 mg, 0.89 mmol) was dissolved in 20 ml of  $\text{Et}_2\text{O}$  and added slowly and drop wise to  $\text{Ca}[\text{N}(\text{SiMe}_3)_2]_2\cdot(\text{Et}_2\text{O})_2$  (454 mg, 0.89 mmol) under  $\text{N}_2$  through a septum. The clear solution was stirred for one day at room temperature, after which  $\text{Et}_2\text{O}$  was removed under vacuum. 20 ml of hexane were added to extract the product and the hexane phase was centrifuged, collected and concentrated to one fifth of its initial volume. Cooling the solution to -20°C gave the product in the form of small colorless crystals. The crystals were washed with cold pentane (3 ml) and dried under vacuum. Yield: 615 mg, 88%.  $^1\text{H}$  NMR (600 MHz,  $\text{C}_6\text{D}_6$ ):  $\delta$  = 0.67 (t,  $^3J_{\text{HH}}$  = 6.8 Hz, 6H,  $\text{Et}_2\text{O}$ ), 1.07 (s, 18H, tBu), 2.21 (s, 24H, o- $\text{CH}_3$ , Mes), 2.24 (s, 12H, p- $\text{CH}_3$ , Mes), 2.91 (q,  $^3J_{\text{HH}}$  = 6.8 Hz, 4H,  $\text{Et}_2\text{O}$ ), 6.81 (s, 8H, Ar).  $^{13}\text{C}$  NMR (151 MHz,  $\text{C}_6\text{D}_6$ ):  $\delta$  = 13.82 ( $\text{Et}_2\text{O}$ ), 20.57 (p-Me, Mes), 20.94 (tBu), 30.05 (o-Me, Mes), 43.91 (C-tBu), 66.88 ( $\text{Et}_2\text{O}$ ), 129.08 (Ar), 129.49 (Ar), 130.69 (Ar), 148.07 (Ar), 176.33 (NCN). Elemental analysis: Calculated for  $\text{C}_{50}\text{H}_{72}\text{N}_4\text{OCa}$ : C 76.48, H 9.24, N 7.14; Found: C 76.40, H 9.45, N 7.25.

**Synthesis of  $(\text{MeAm}^{\text{DIPP}})[\text{N}(\text{SiMe}_3)_2]_2\text{CaK}$**   $\text{MeAm}^{\text{DIPP}}\text{H}$  (600 mg, 1.58 mmol) and  $\text{KN}(\text{SiMe}_3)_2$  (632 mg, 3.17 mmol) were dissolved in 30 ml of  $\text{Et}_2\text{O}$  and stirred at room temperature for one hour.  $\text{CaI}_2$  (466 mg, 1.58 mmol) was added under  $\text{N}_2$  and the slurry was stirred at 40°C under reflux conditions for three days.  $\text{Et}_2\text{O}$  was removed under vacuum and the product extracted with 20 ml of hexane/ $\text{Et}_2\text{O}$  (9:1). The liquid phase was collected after centrifugation and concentrated slightly. Slow cooling to -20°C resulted in the precipitation of a white microcrystalline product, which was washed with cold pentane (1 ml) and shortly dried under vacuum. Crystals suitable for X-ray spectroscopy were obtained by slowly evaporating the solvent from a saturated  $\text{Et}_2\text{O}$  solution. Yield: 420 mg, 34%.  $^1\text{H}$  NMR (400 MHz,  $\text{C}_6\text{D}_6$ ):  $\delta$  = 0.09 (s, 36H,  $\text{SiMe}_3$ ), 1.30 (d,  $^3J_{\text{HH}}$  = 6.8 Hz, 12H, iPr), 1.48 (d,  $^3J_{\text{HH}}$  = 6.9 Hz, 12H, iPr), 1.54 (s, 3H, Me), 3.63 (hept,  $^3J_{\text{HH}}$  = 6.6 Hz, 4H, iPr), 7.12 – 7.24 (m, 6H, Ar).  $^{13}\text{C}$  NMR (101 MHz,  $\text{C}_6\text{D}_6$ ):  $\delta$  = 6.62 ( $\text{SiMe}_3$ ), 18.23 (pTol- $\text{CH}_3$ ), 25.17 (iPr), 25.27 (iPr), 28.20 (iPr), 123.40 (Ar), 123.61 (Ar), 142.73 (Ar), 147.27 (Ar), 173.75 (NCN). Elemental analysis: Calculated for  $\text{C}_{38}\text{H}_{73}\text{N}_4\text{Si}_4\text{KCa}$ : C 58.70, H 9.46; Found: C 58.54, H 9.40.

#### 4. Selected $^1\text{H}$ and $^{13}\text{C}$ NMR spectra

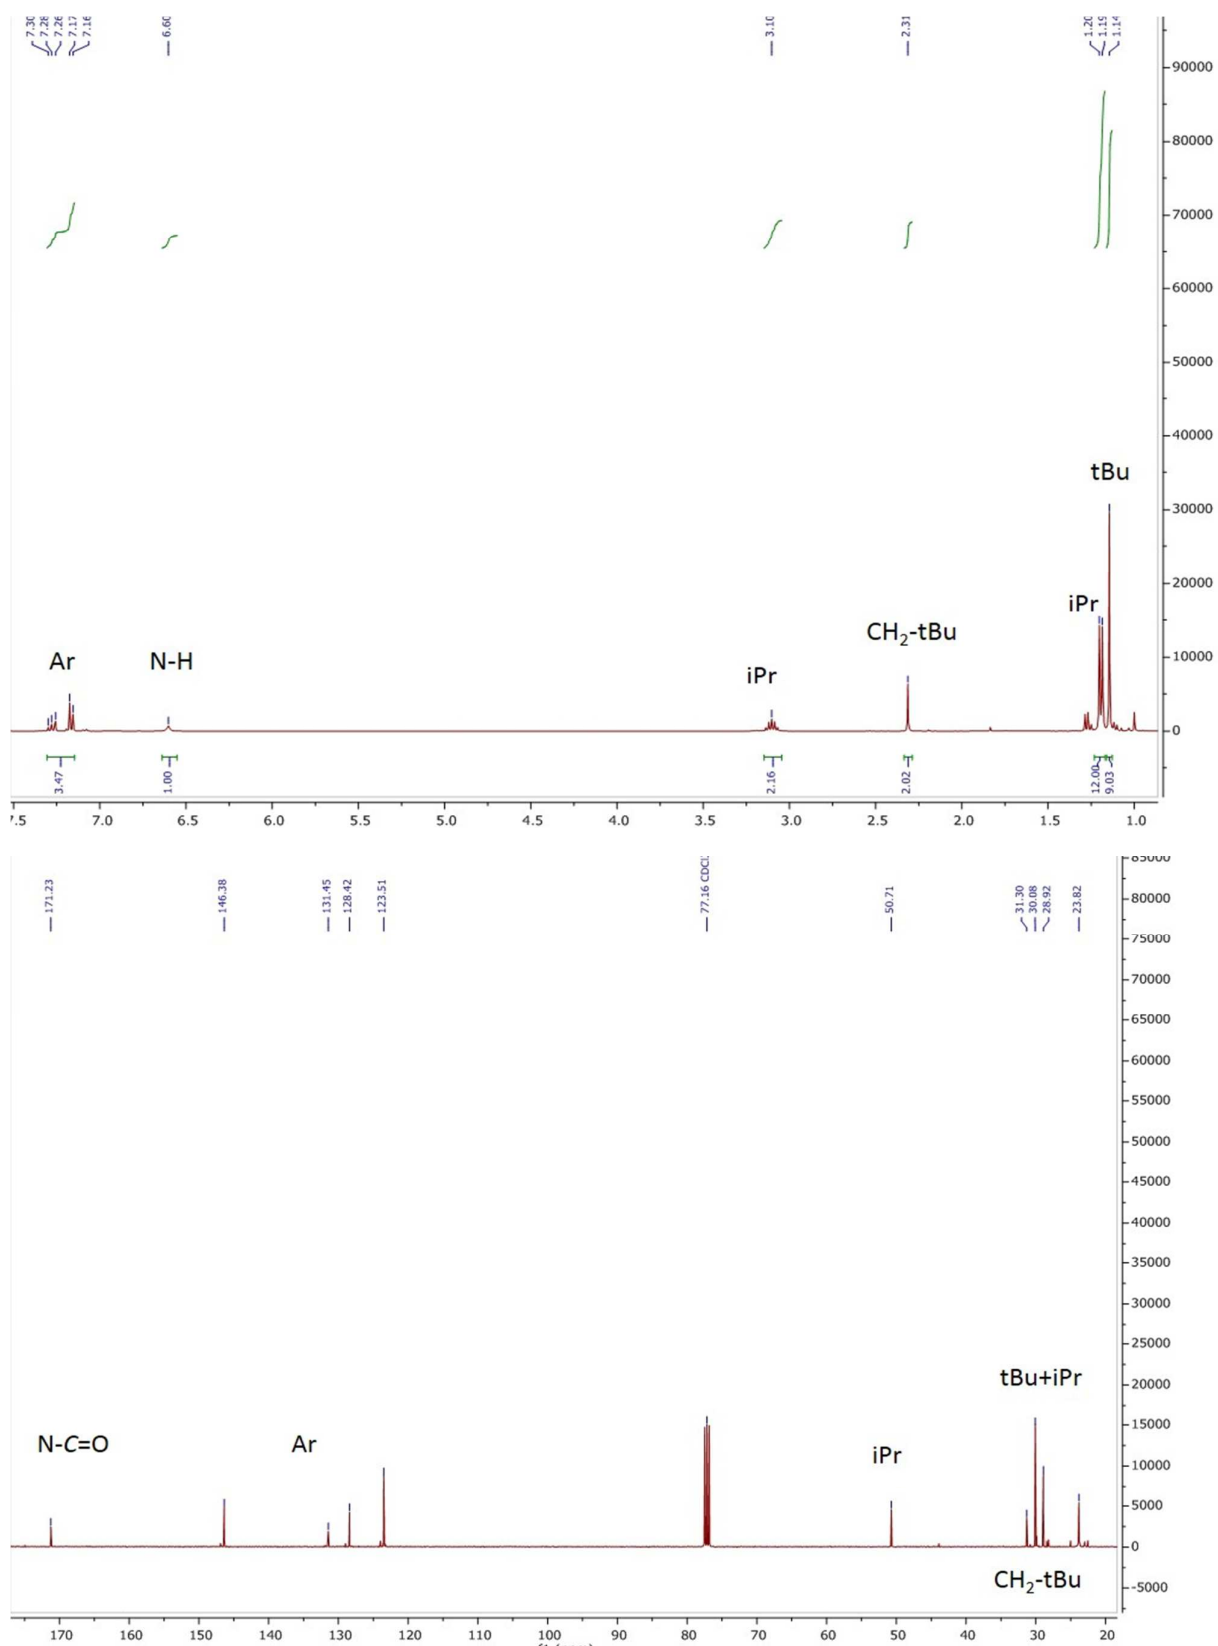

**Figure S7.**  $^1\text{H}$  and  $^{13}\text{C}$  spectra of  $\text{NpC(O)N(H)DIPP}$  in  $\text{CDCl}_3$

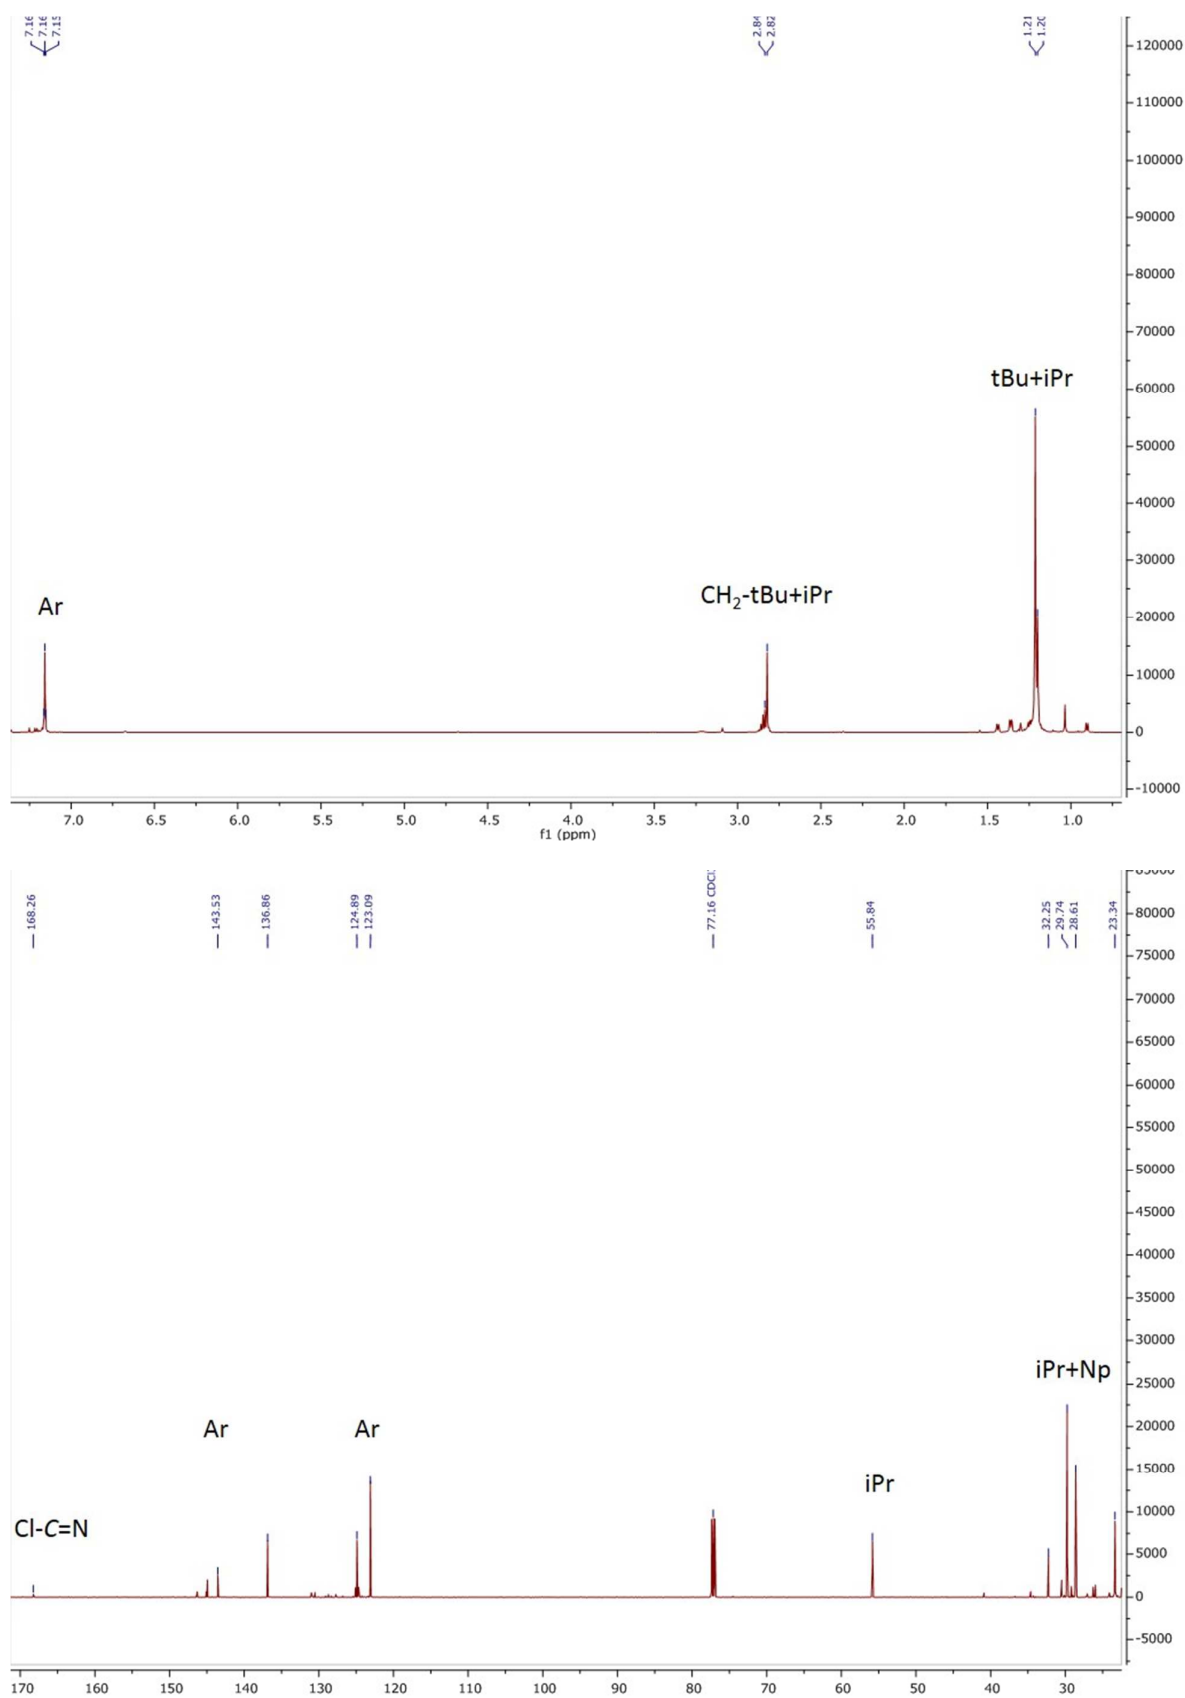

**Figure S8.**  $^1\text{H}$  and  $^{13}\text{C}$  spectra of  $\text{NpC(Cl)NDIPP}$  in  $\text{CDCl}_3$



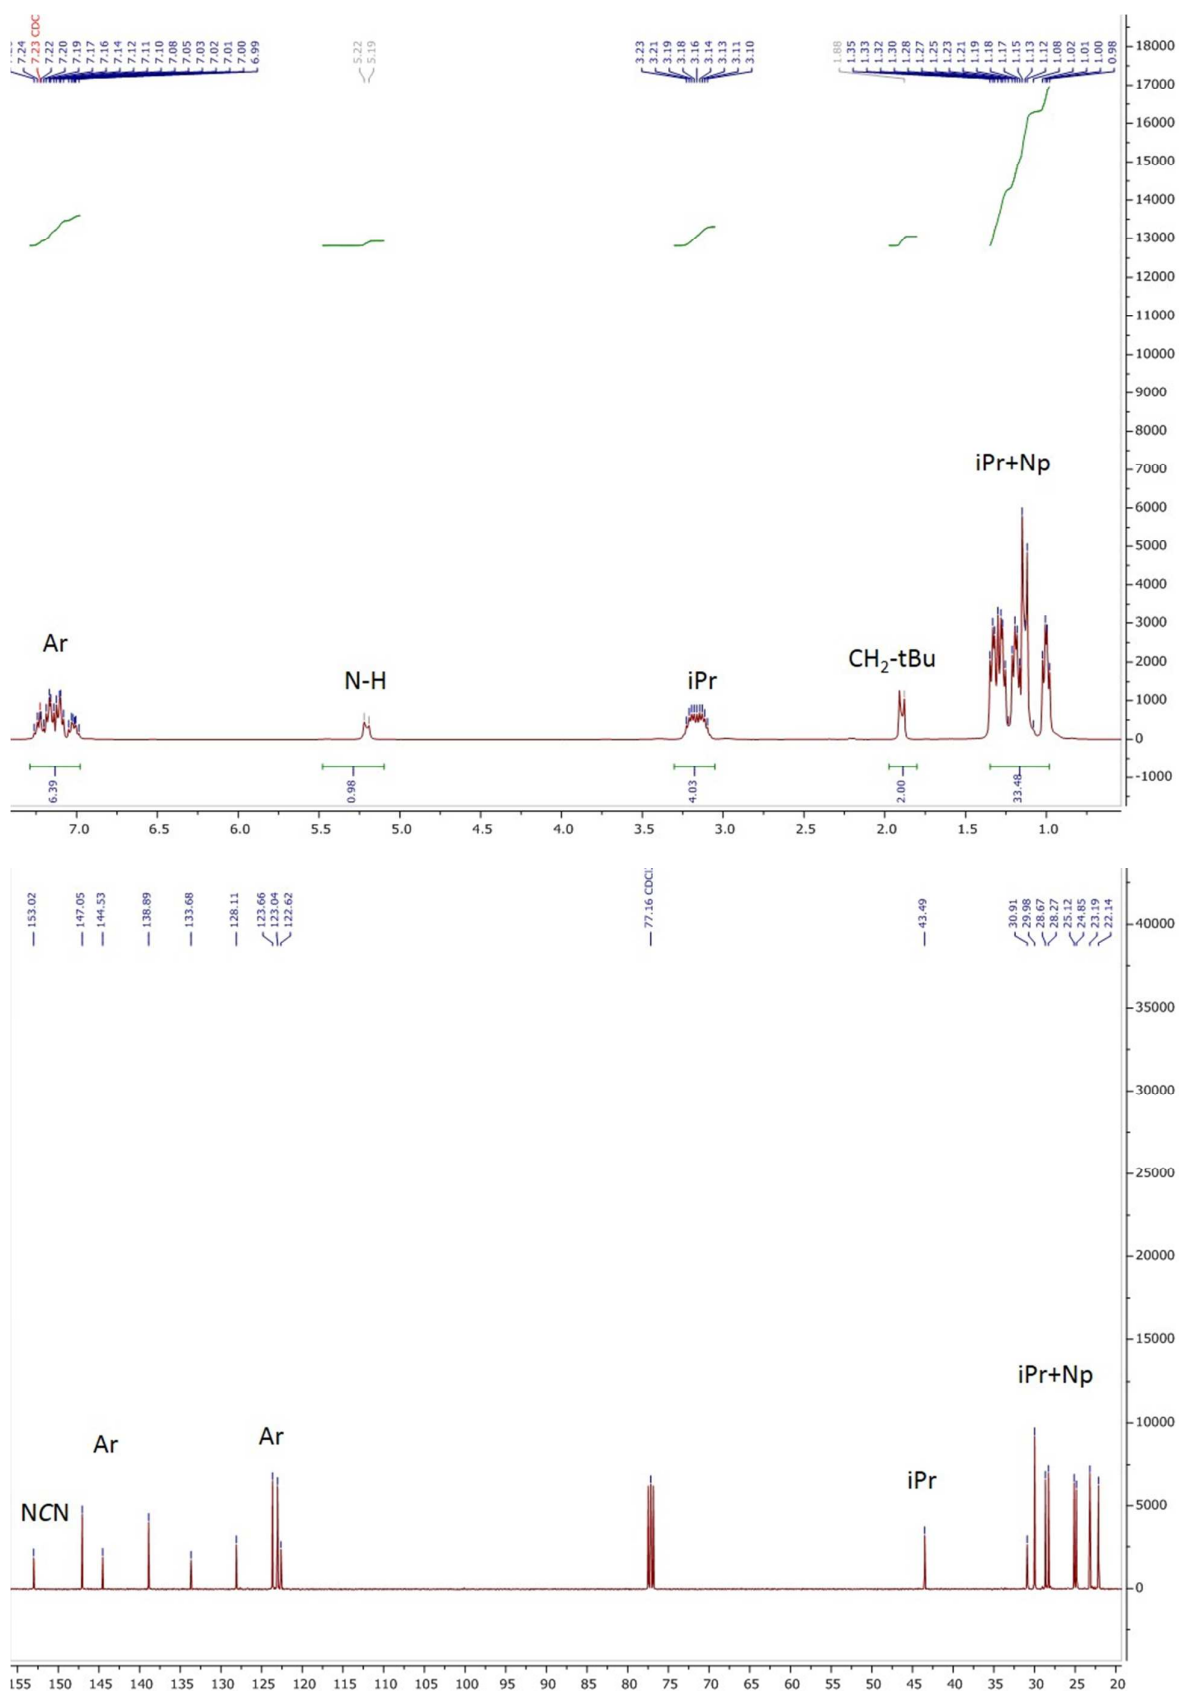

**Figure S9.**  $^1\text{H}$  and  $^{13}\text{C}$  spectra of  $\text{NpAm}^{\text{DIPP}}\text{H}$  in  $\text{CDCl}_3$ ; several isomers present in solution make the spectra hard to interpret.

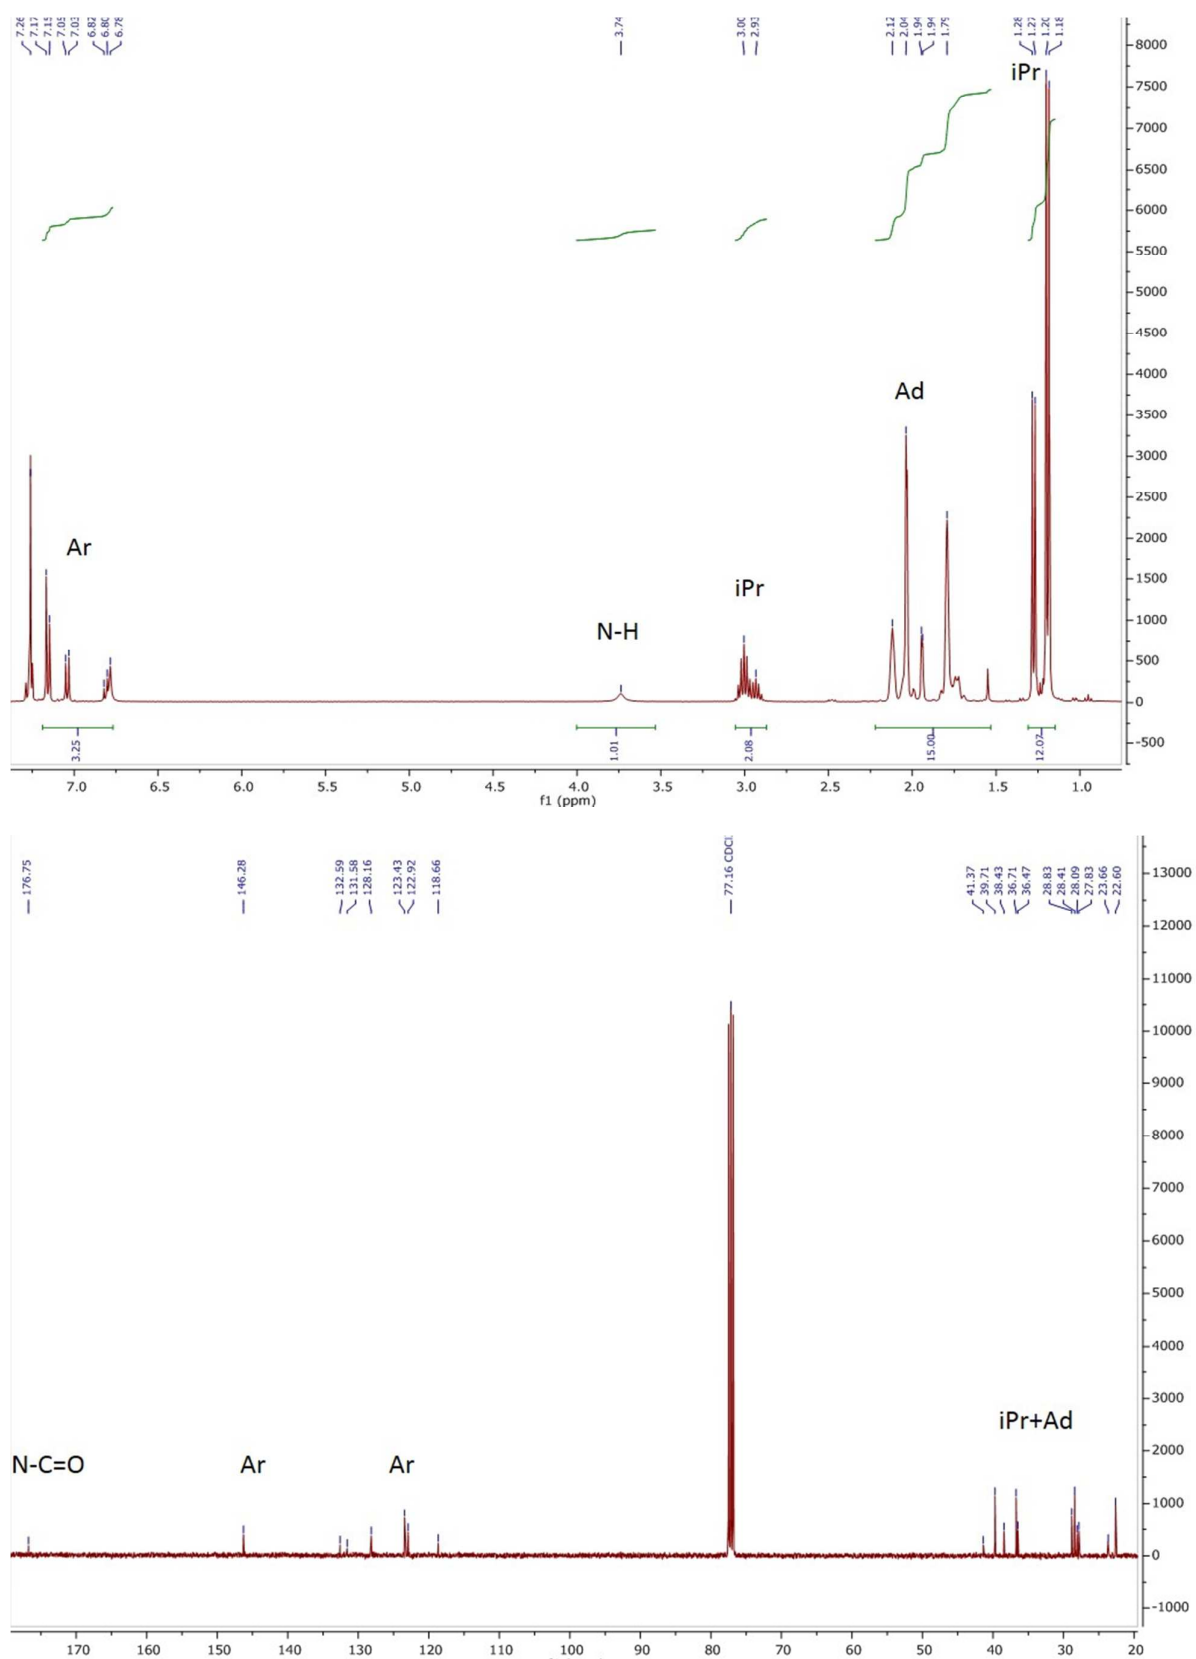

**Figure S10.** <sup>1</sup>H and <sup>13</sup>C spectra of AdC(O)N(H)DIPP in CDCl<sub>3</sub>: two isomers present in solution (*syn* and *anti*)

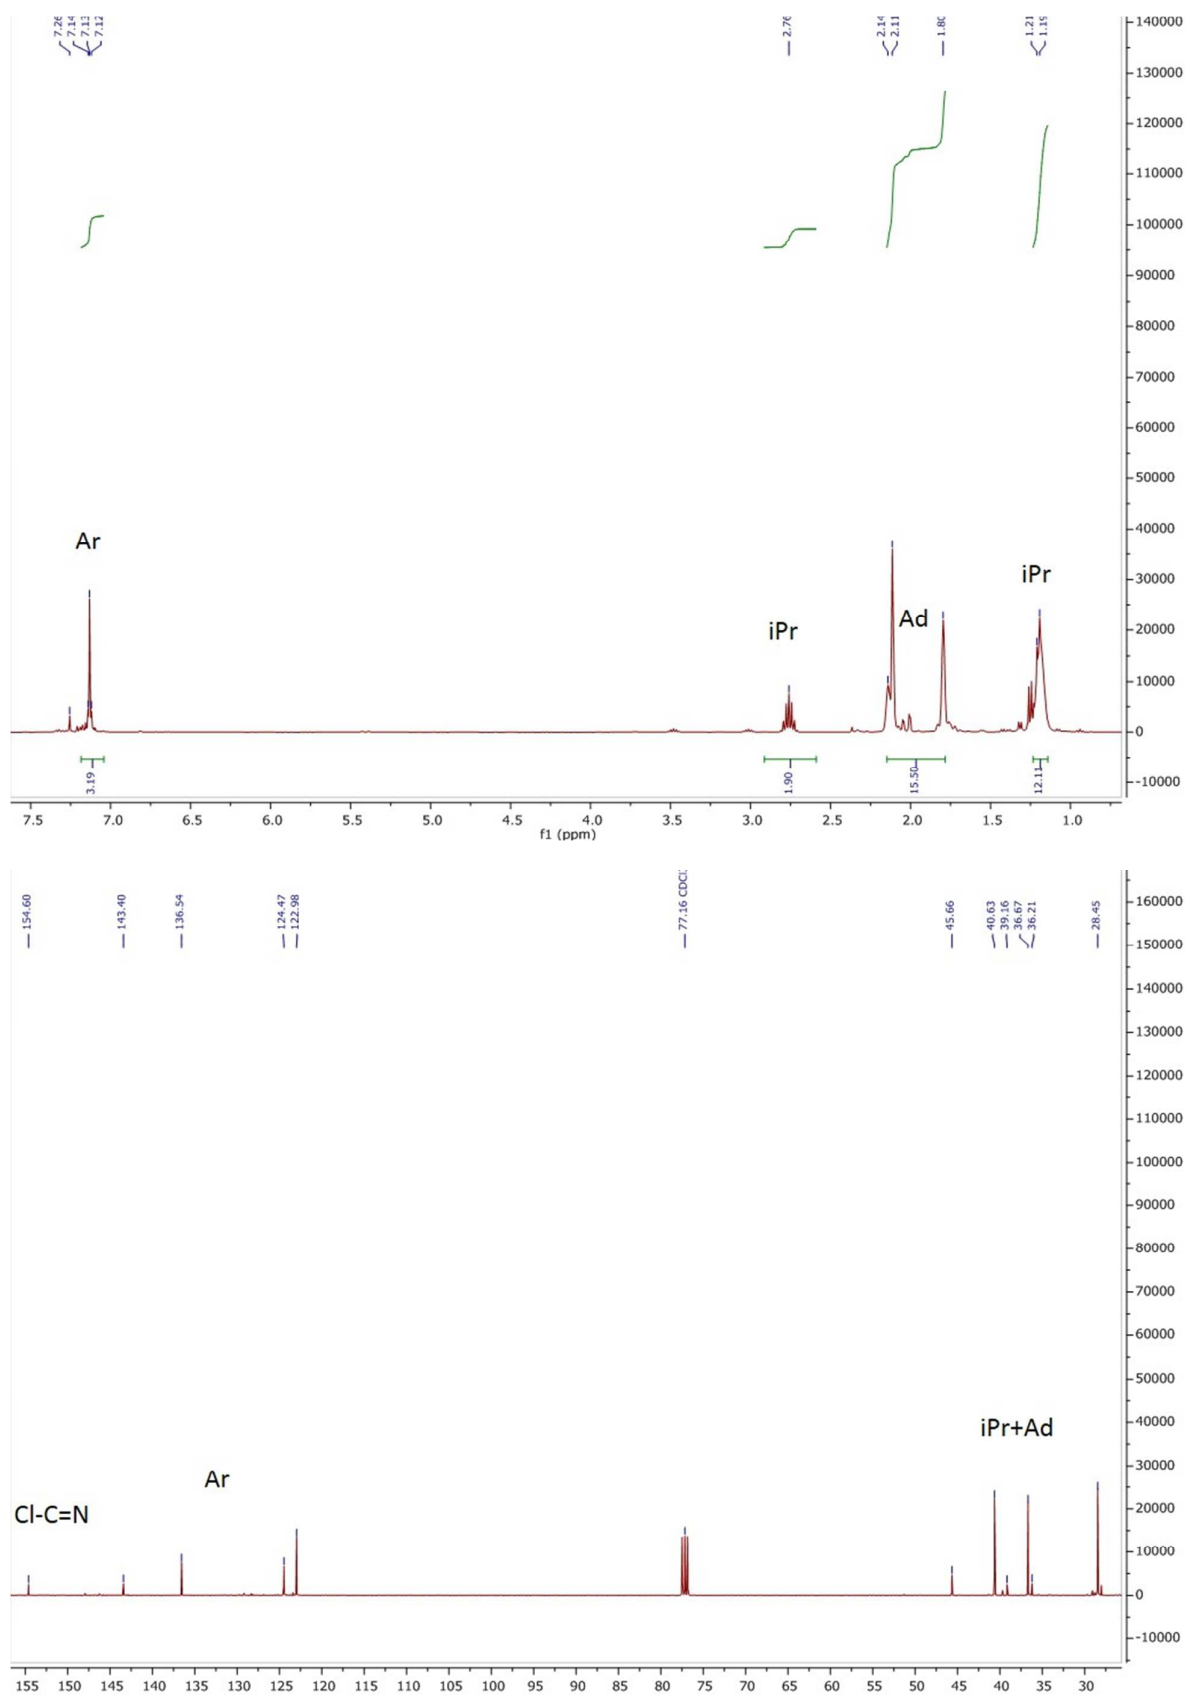

**Figure S11.** <sup>1</sup>H and <sup>13</sup>C spectra of AdC(Cl)NDIPP in CDCl<sub>3</sub>

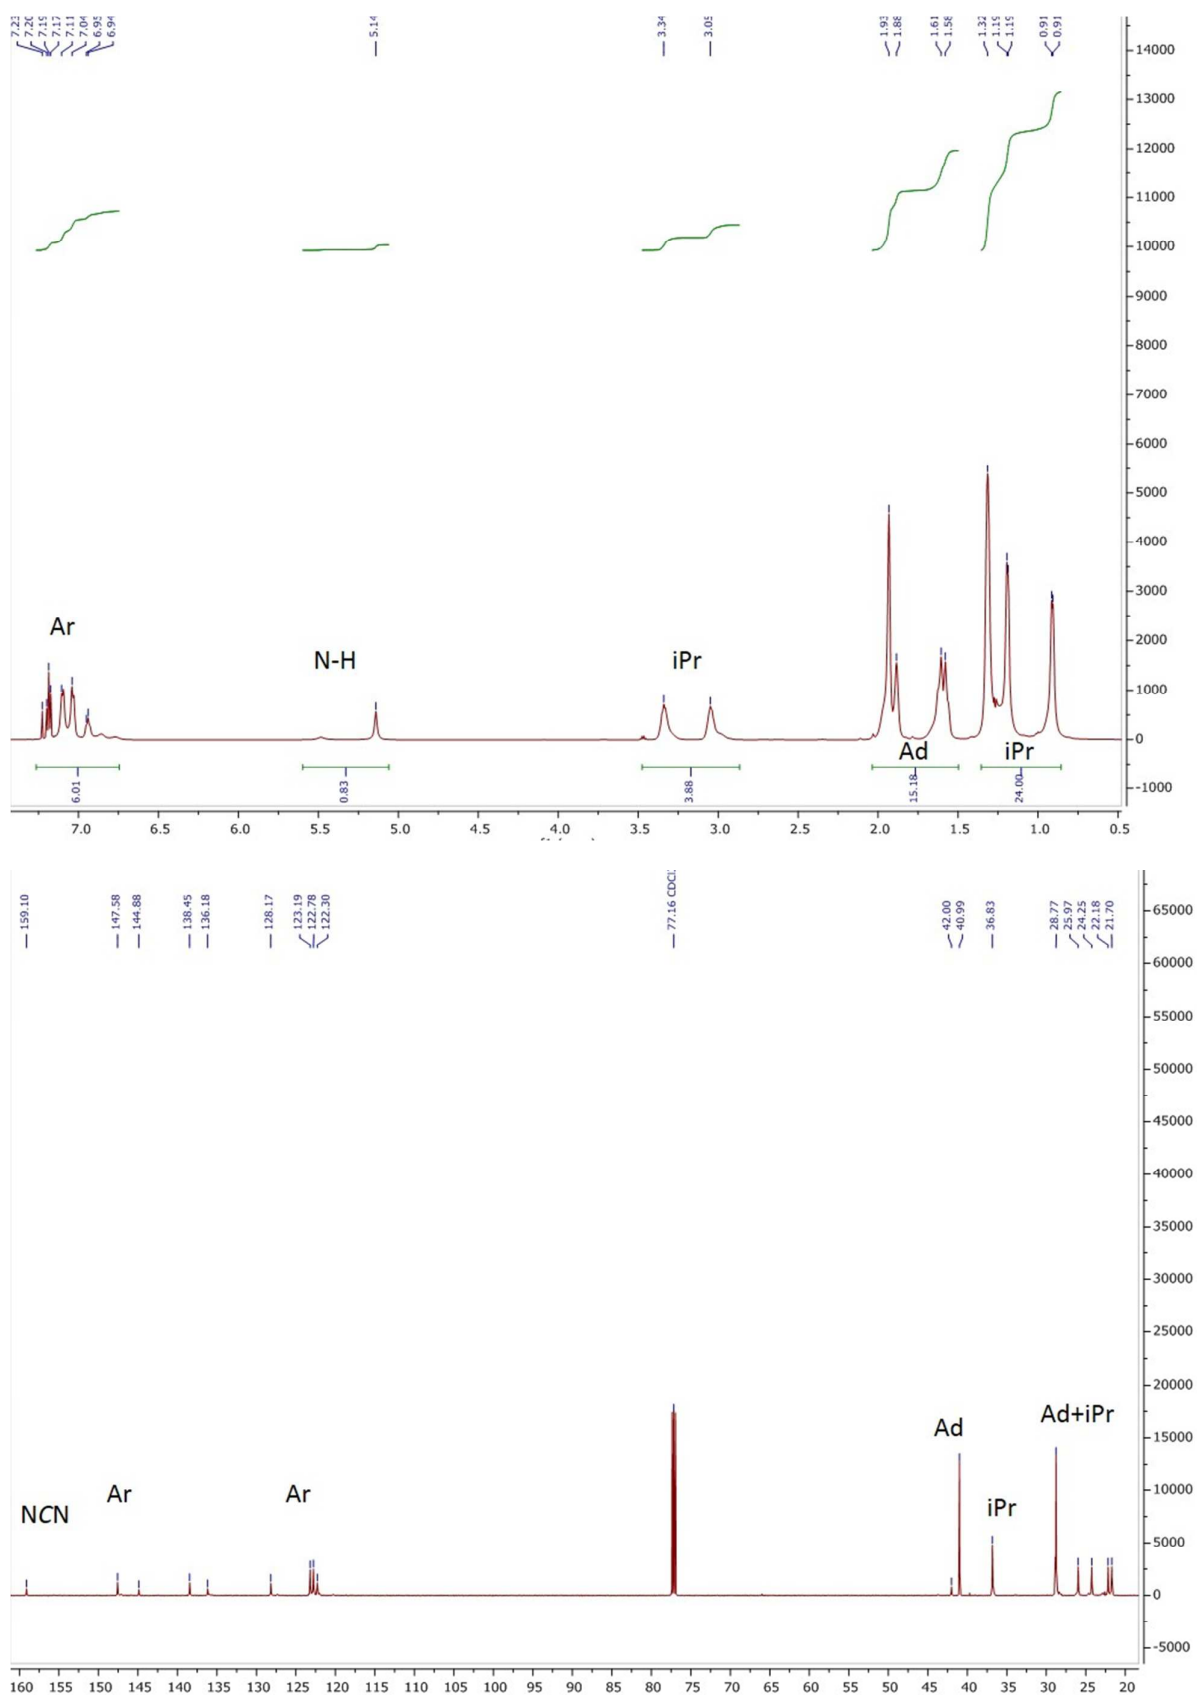

**Figure S12.**  $^1\text{H}$  and  $^{13}\text{C}$  spectra of  $\text{AdAm}^{\text{DIPP}}$  in  $\text{CDCl}_3$ ; several isomers present in solution make the spectra hard to interpret.

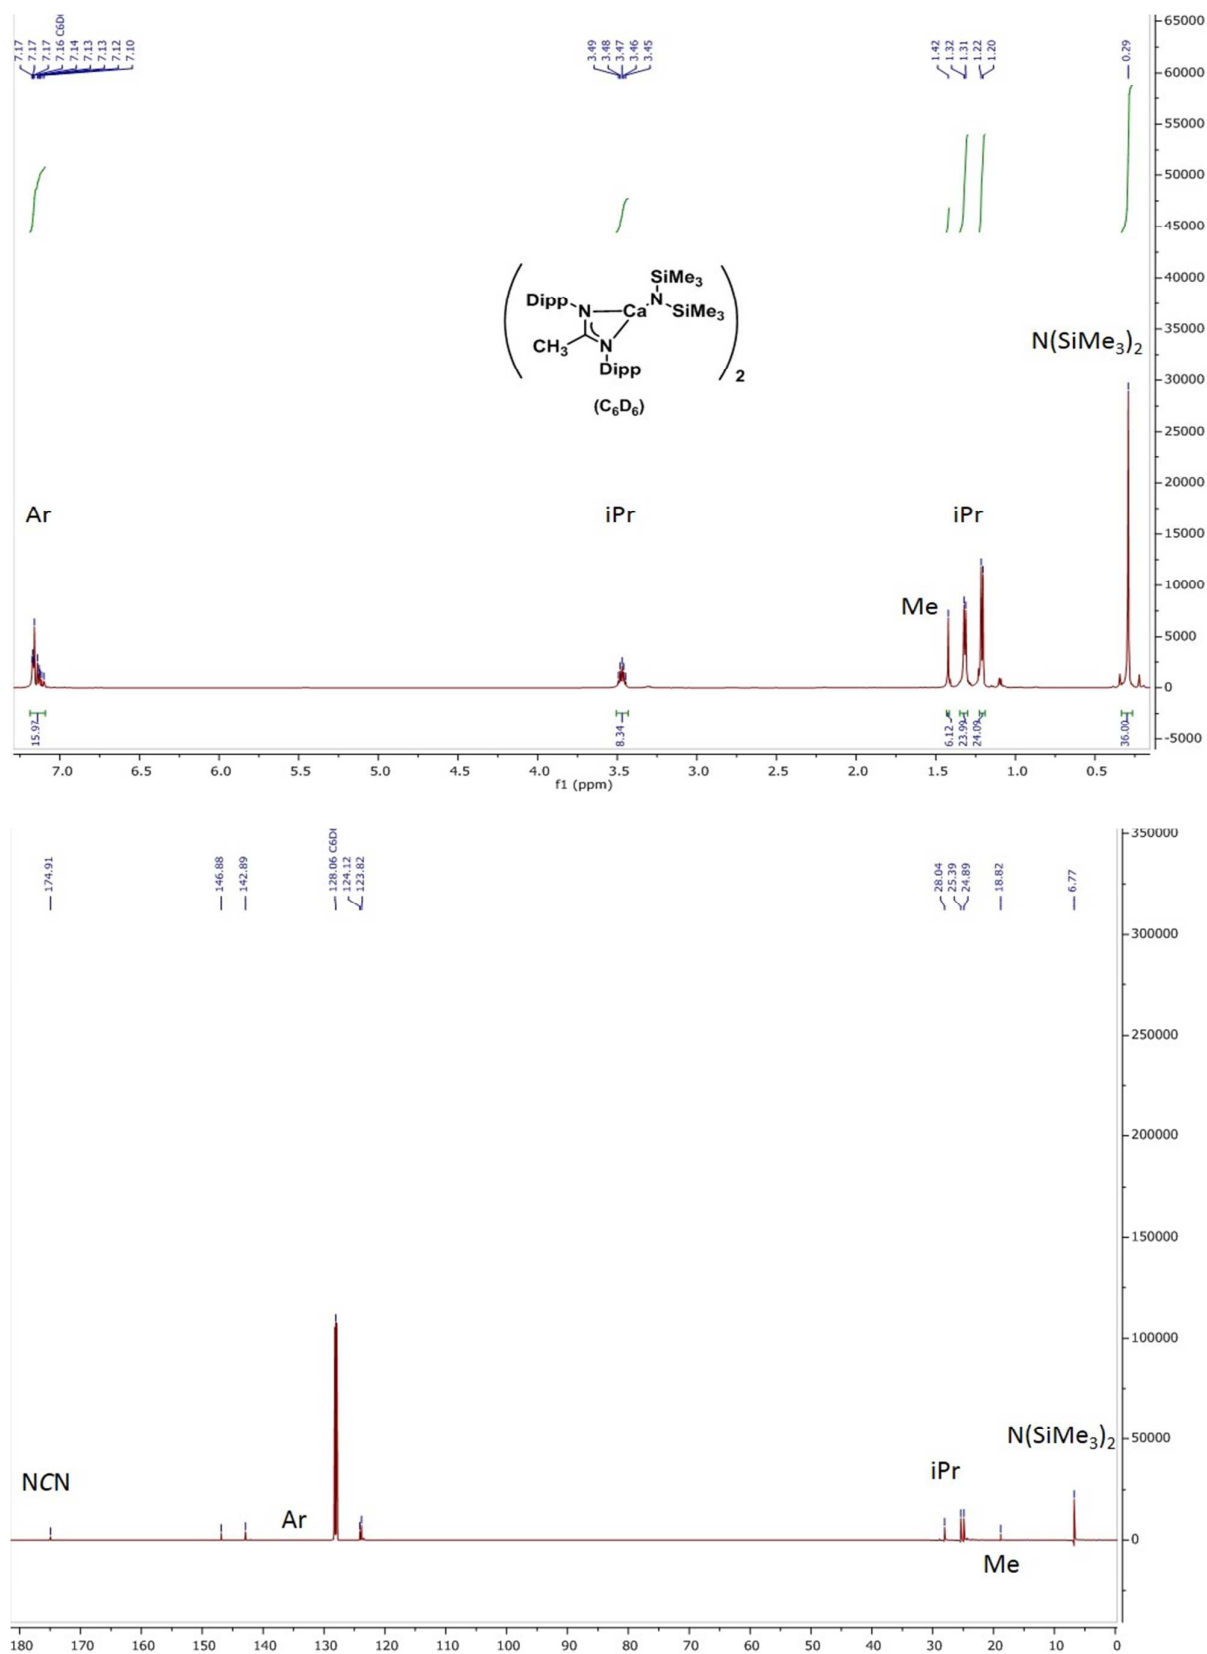

**Figure S13.** <sup>1</sup>H and <sup>13</sup>C spectra of [MeAm<sup>DIPP</sup>CaN(SiMe<sub>3</sub>)<sub>2</sub>]<sub>2</sub> in C<sub>6</sub>D<sub>6</sub>

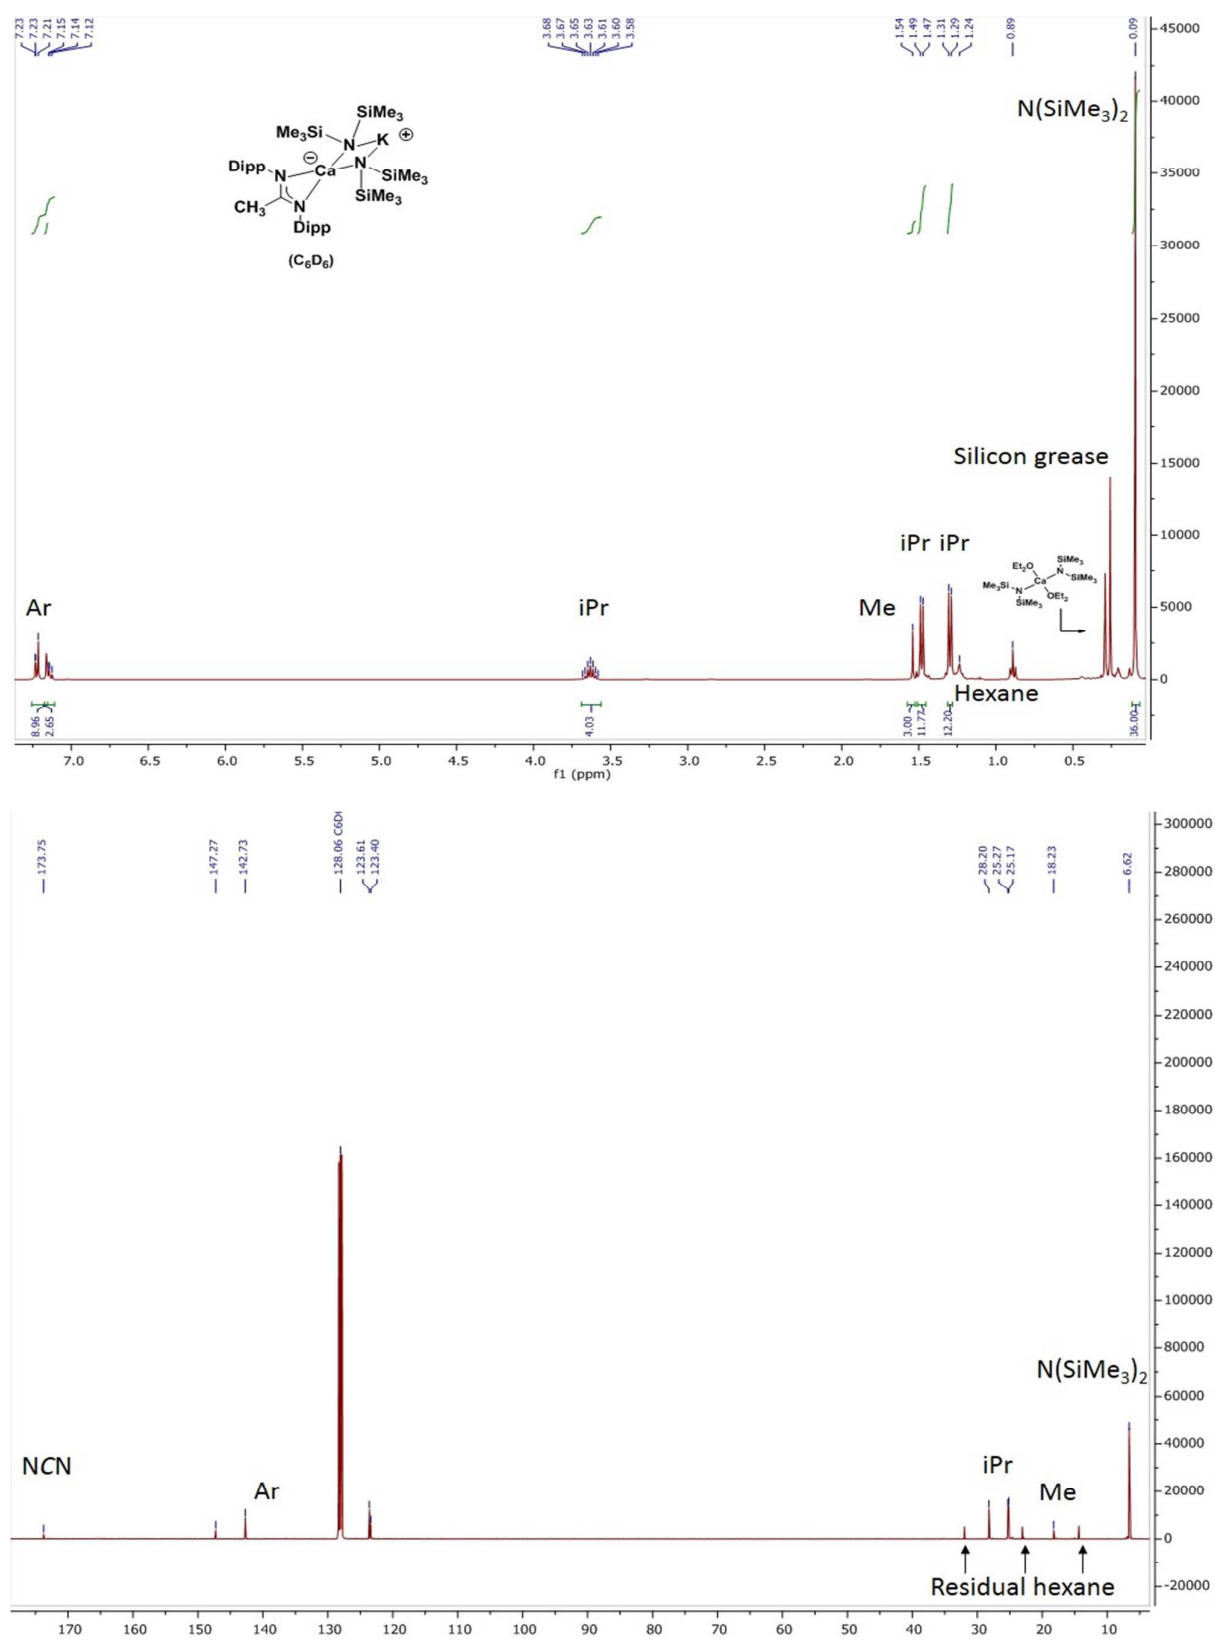

Figure S14.  $^1\text{H}$  and  $^{13}\text{C}$  spectra of  $(\text{MeAm}^{\text{DIPP}})[\text{N}(\text{SiMe}_3)_2]_2\text{CaK}$  in  $\text{C}_6\text{D}_6$

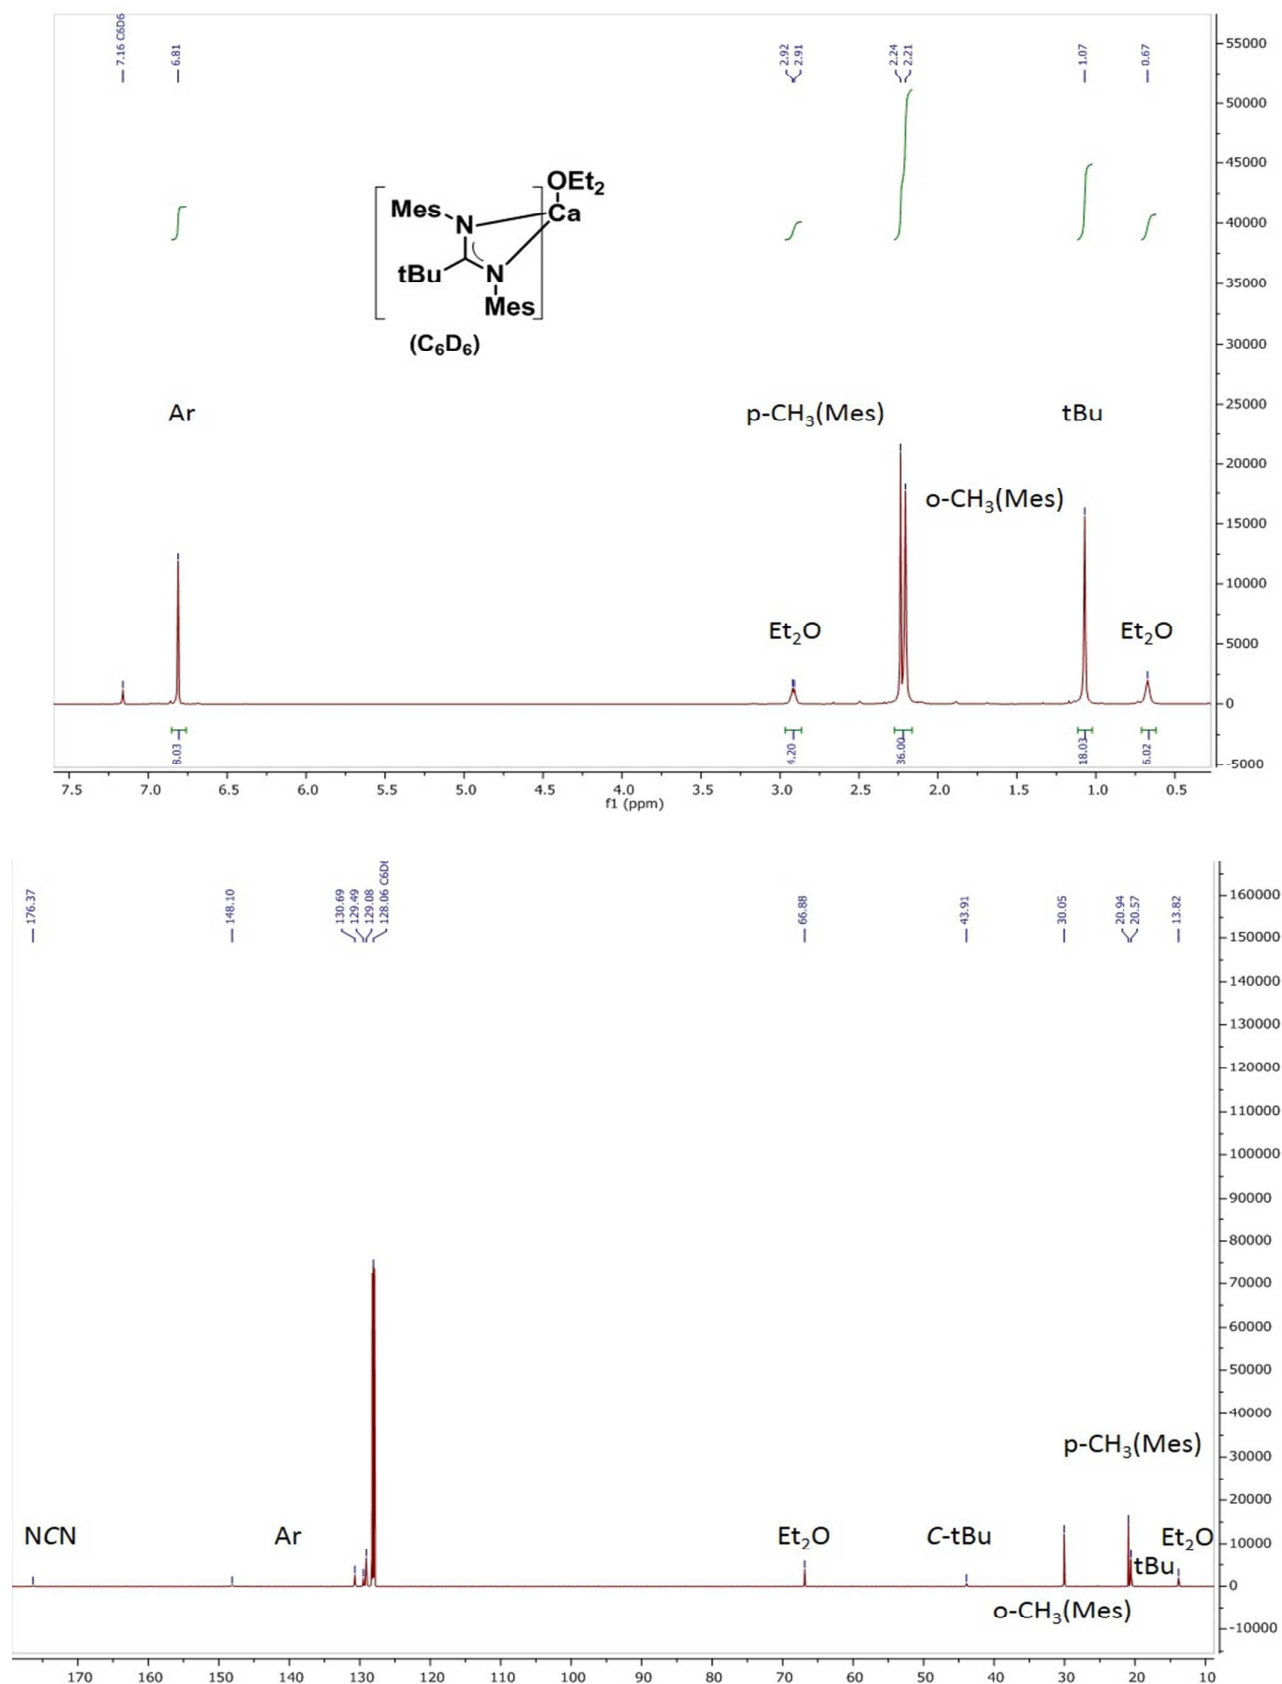

**Figure S15.**  $^1\text{H}$  and  $^{13}\text{C}$  spectra of  $(t\text{BuAm}^{\text{Mes}})_2\text{Ca} \cdot \text{Et}_2\text{O}$  in  $\text{C}_6\text{D}_6$

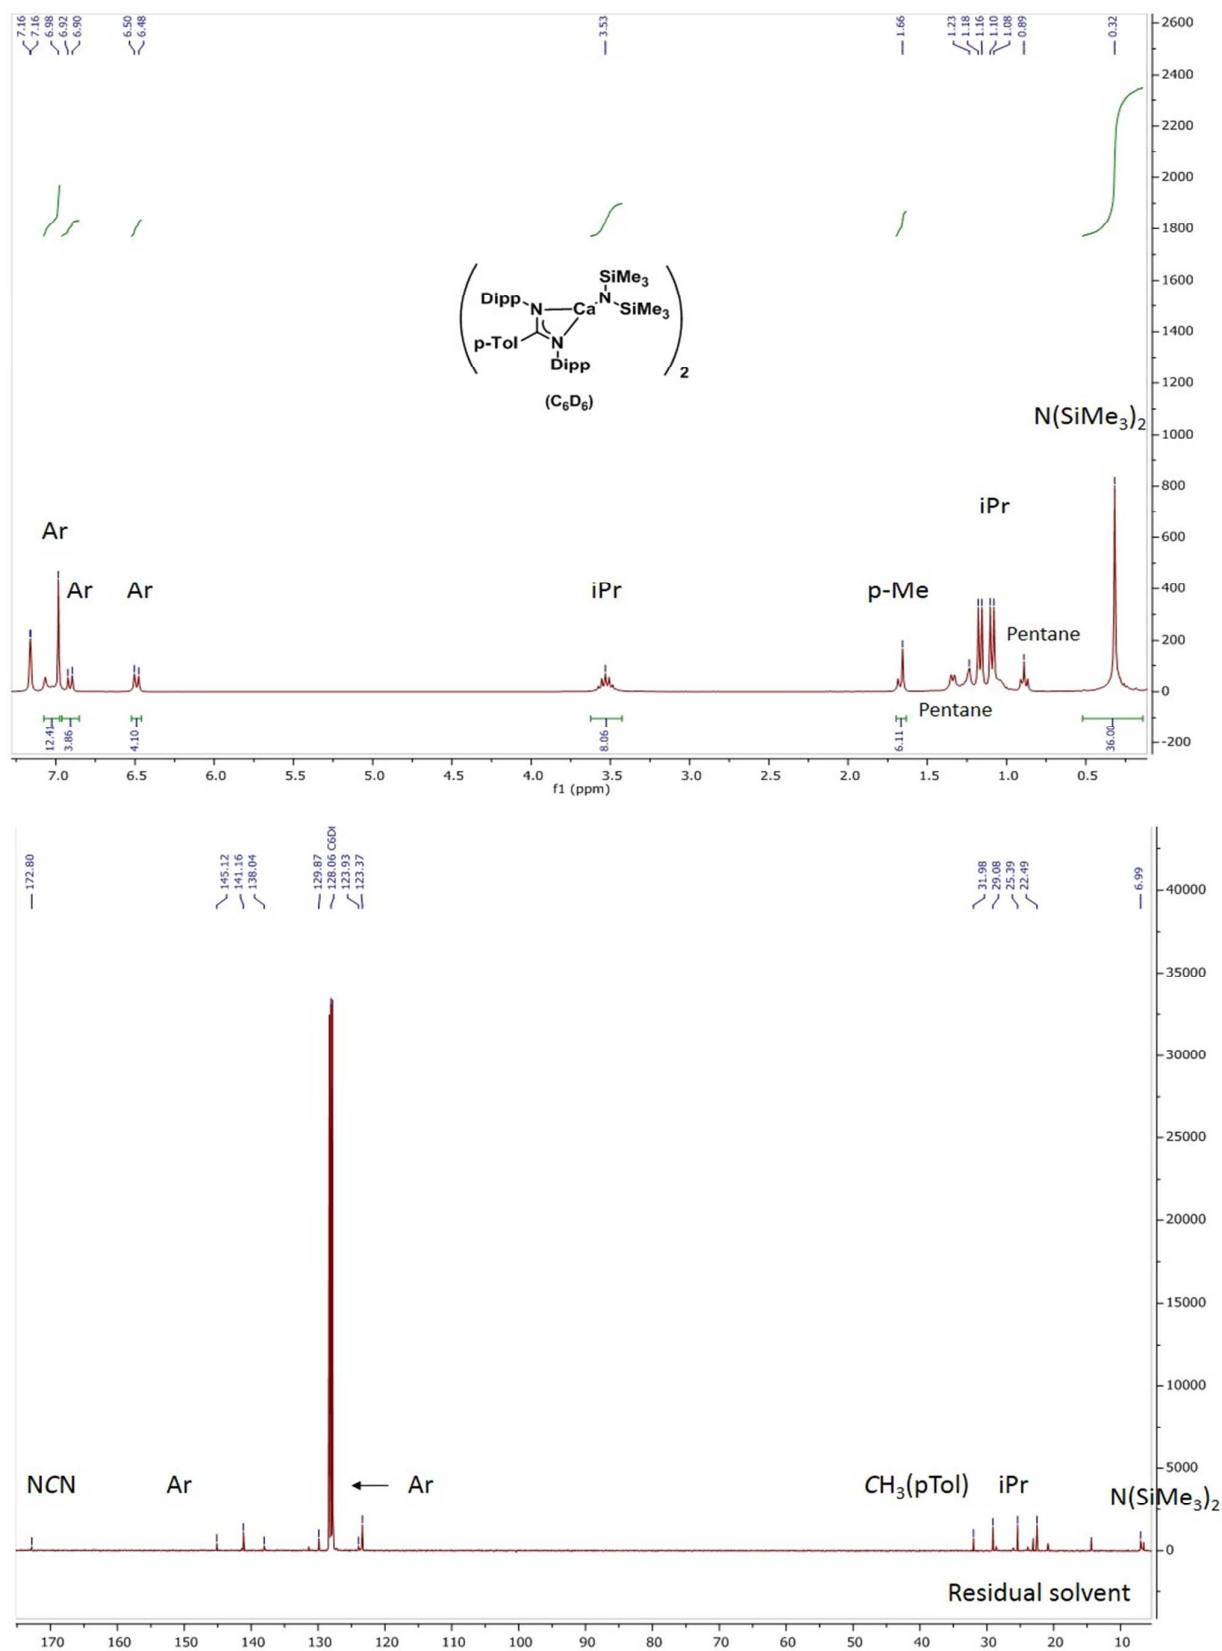

**Figure S16.** <sup>1</sup>H and <sup>13</sup>C spectra of [p-TolAm<sup>DIPP</sup>CaN(SiMe<sub>3</sub>)<sub>2</sub>]<sub>2</sub> in C<sub>6</sub>D<sub>6</sub>



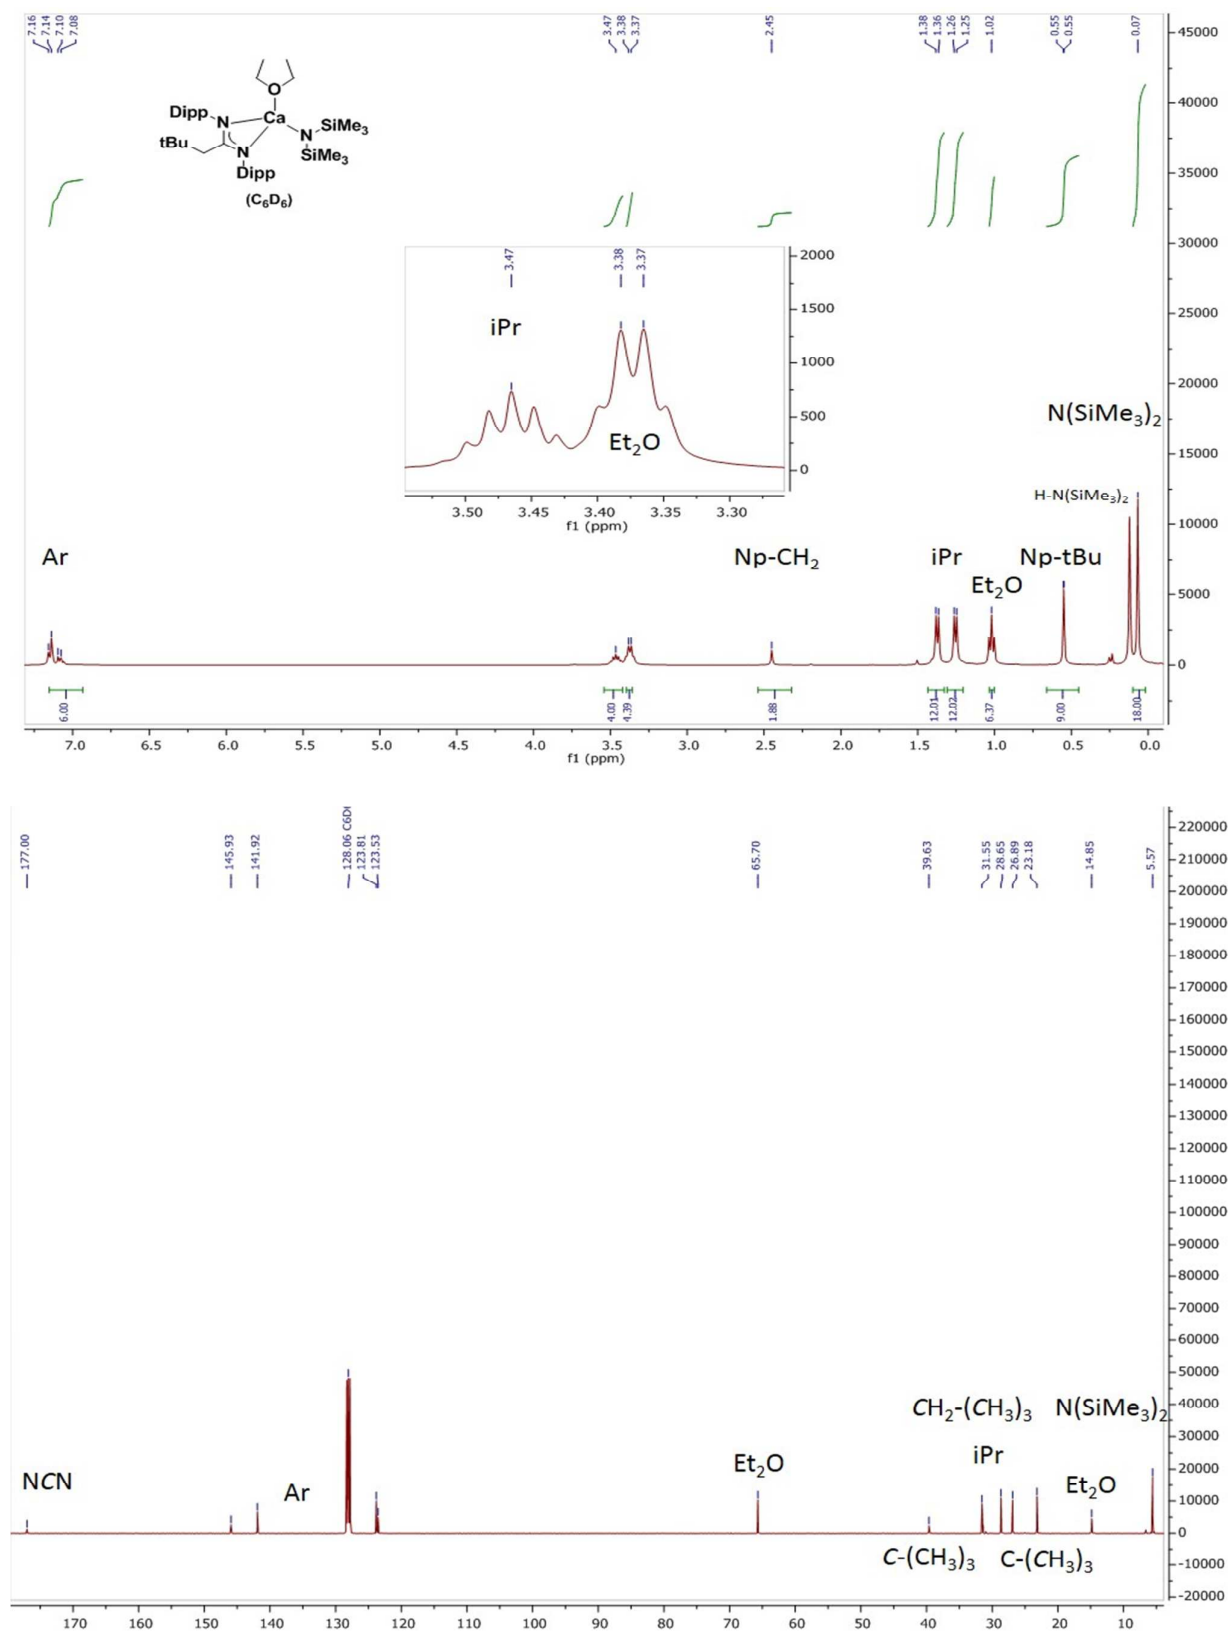

Figure S17. <sup>1</sup>H and <sup>13</sup>C spectra of NpAm<sup>DIPP</sup>CaN(SiMe<sub>3</sub>)<sub>2</sub>·Et<sub>2</sub>O in C<sub>6</sub>D<sub>6</sub>

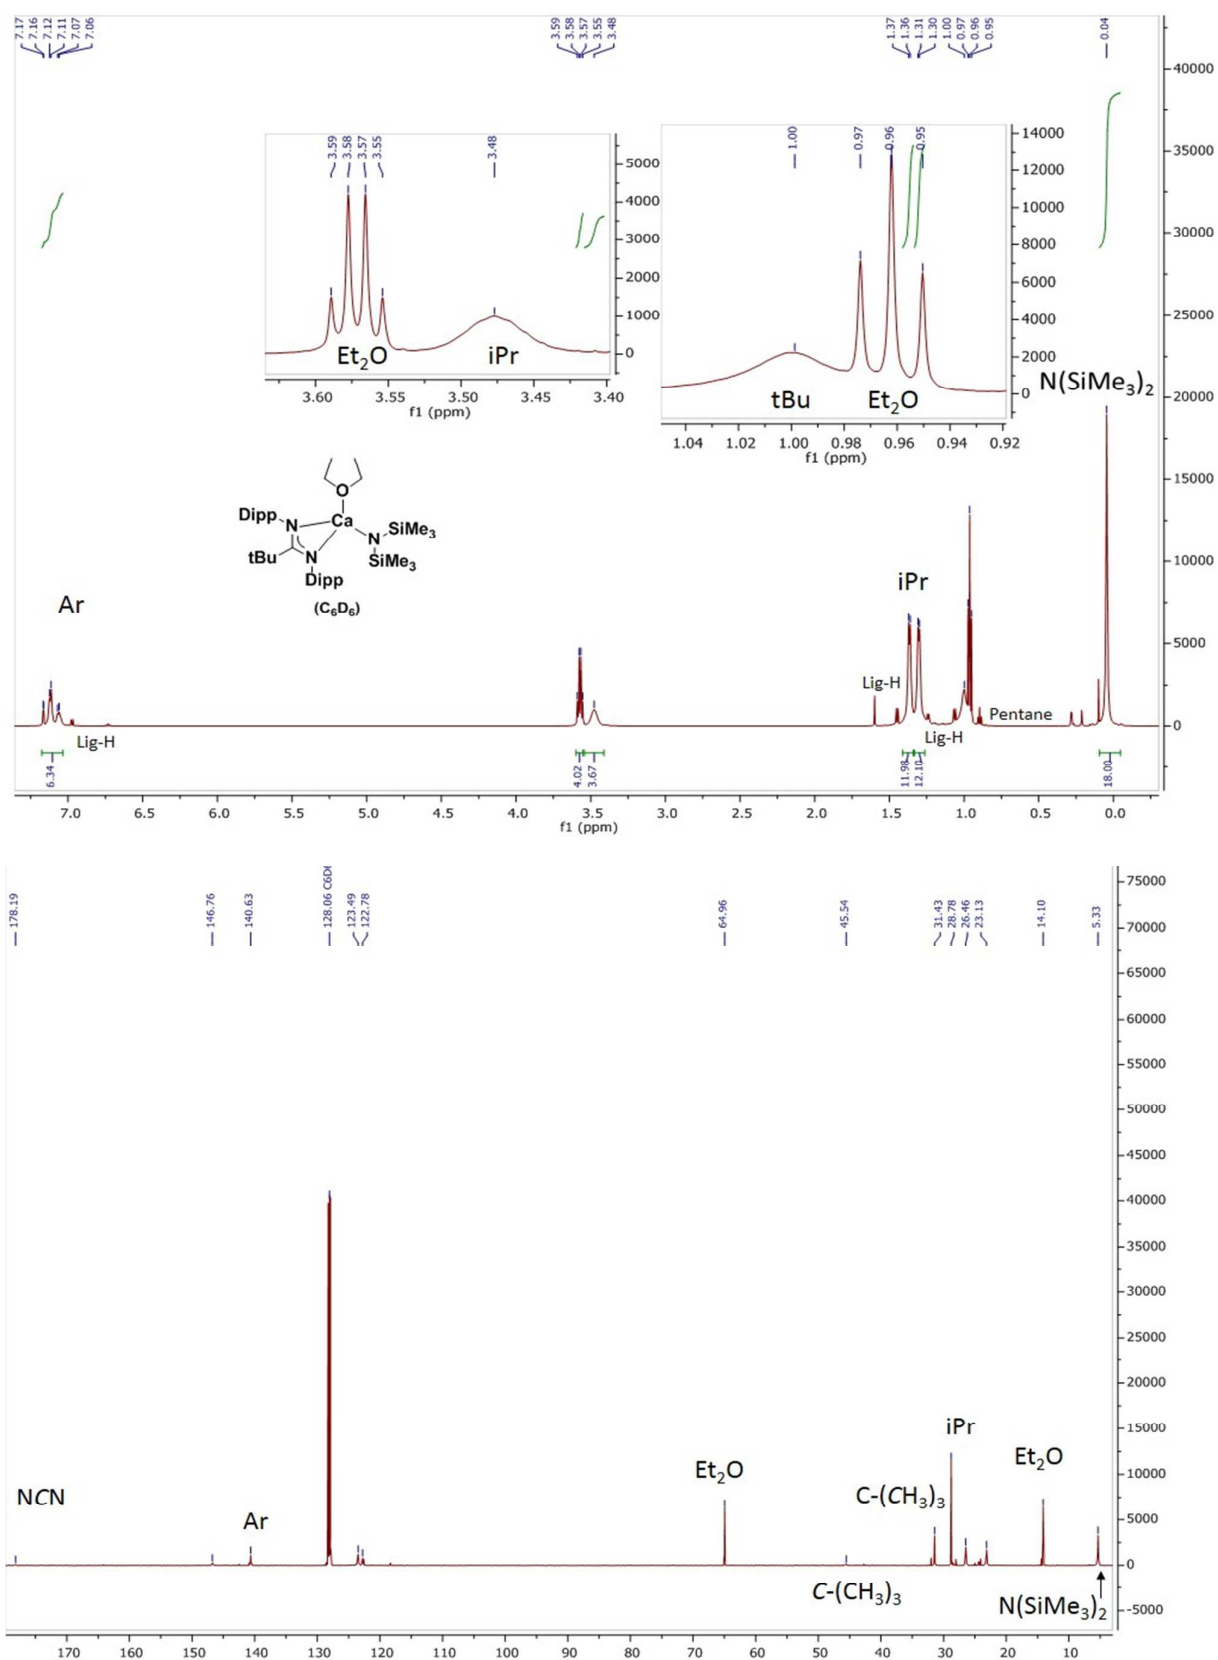

**Figure S18.**  $^1\text{H}$  and  $^{13}\text{C}$  spectra of  $t\text{BuAm}^{\text{DIPP}}\text{CaN}(\text{SiMe}_3)_2 \cdot (\text{Et}_2\text{O})$  in  $\text{C}_6\text{D}_6$

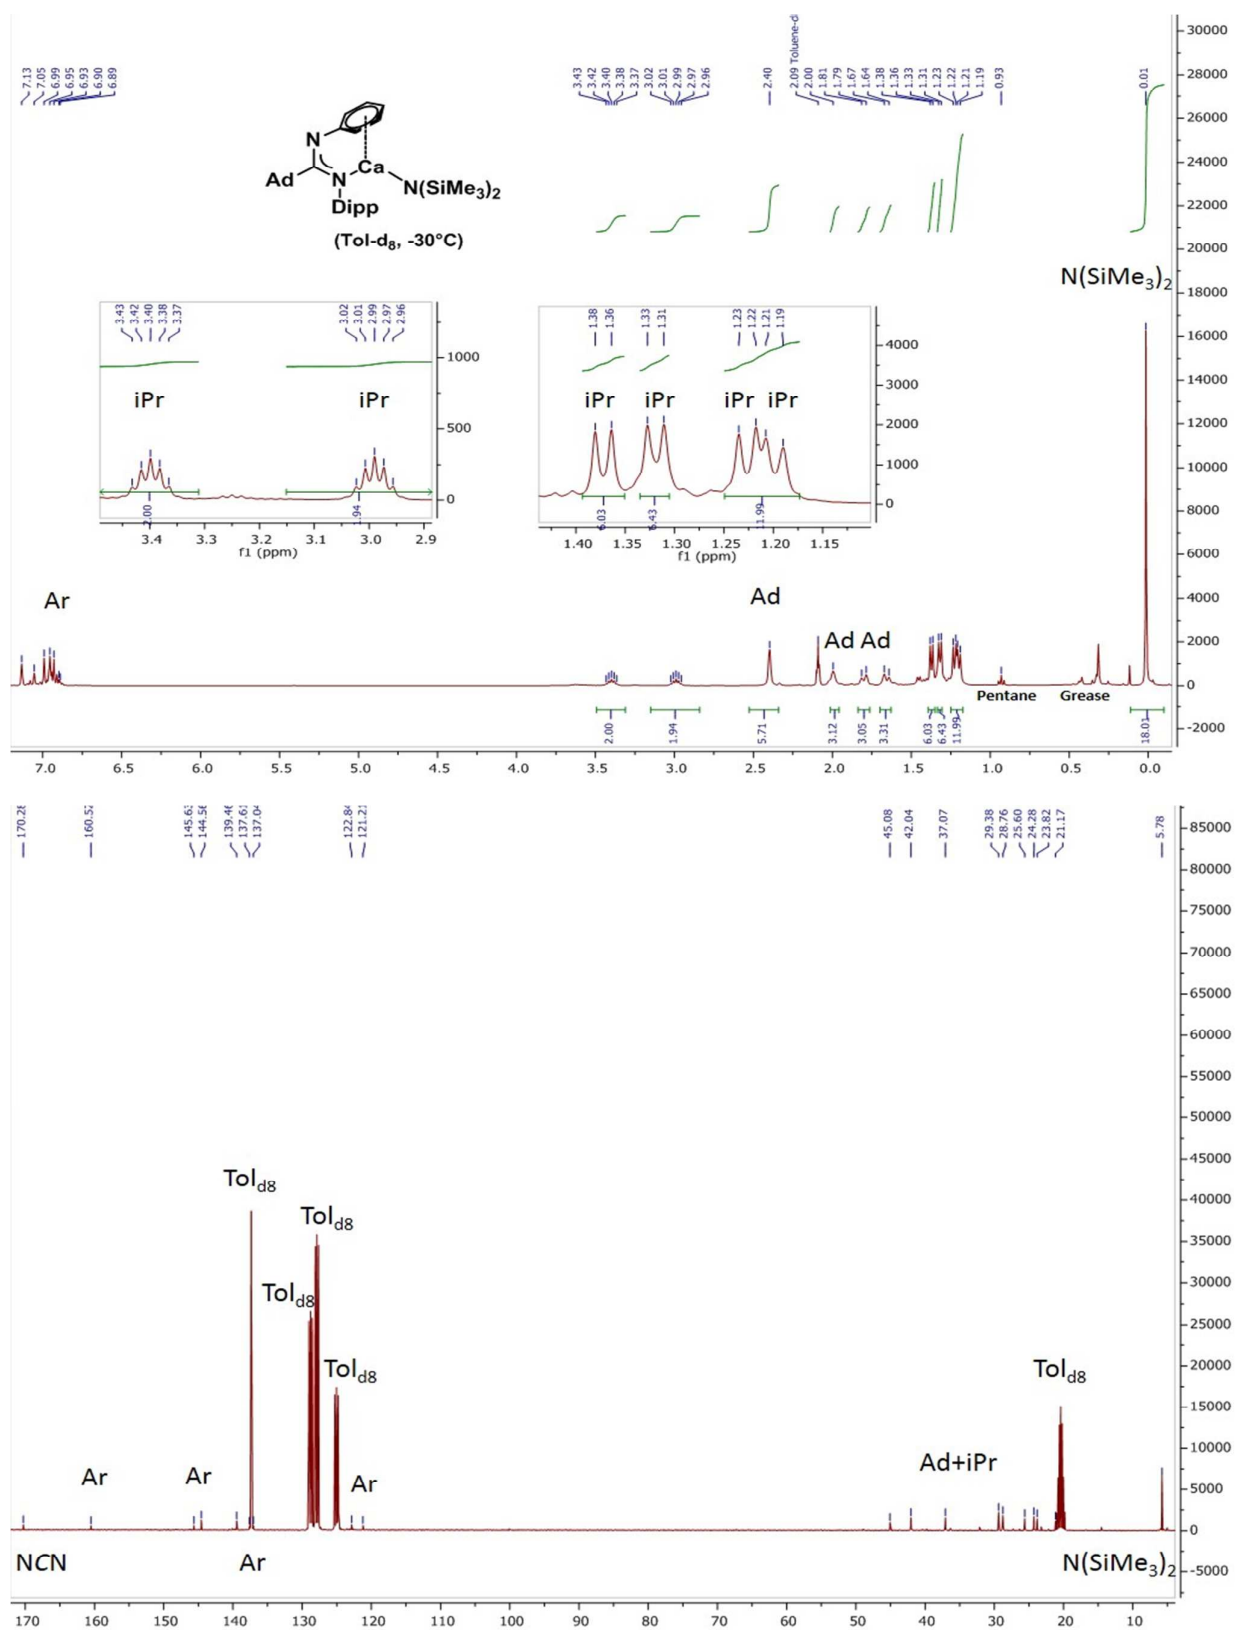

**Figure S19.** <sup>1</sup>H and <sup>13</sup>C spectra of AdAm<sup>DIPP</sup>CaN(SiMe<sub>3</sub>)<sub>2</sub> in toluene-d<sub>8</sub> at -30°C

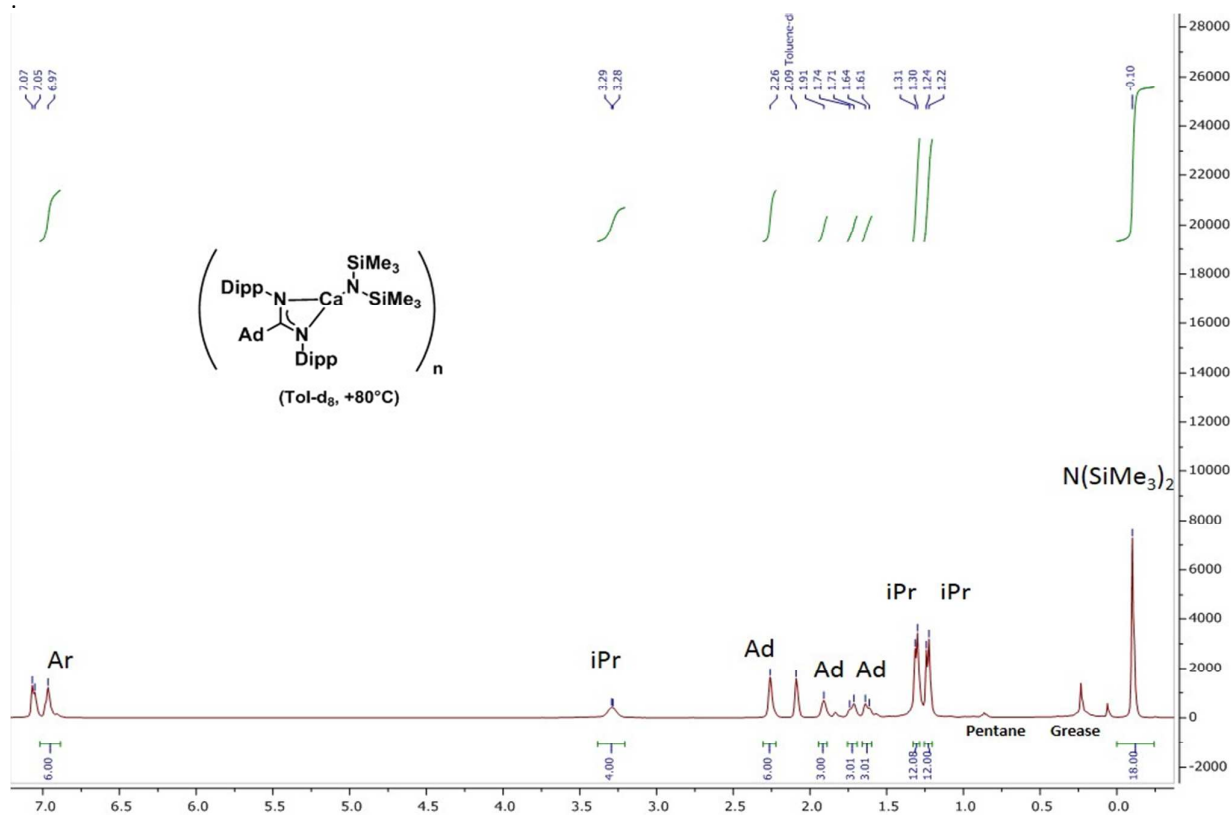

**Figure S20.**  $^1\text{H}$  spectrum of  $\text{AdAm}^{\text{DIPP}}\text{CaN}(\text{SiMe}_3)_2$  in toluene- $d_8$  at  $+80^\circ\text{C}$

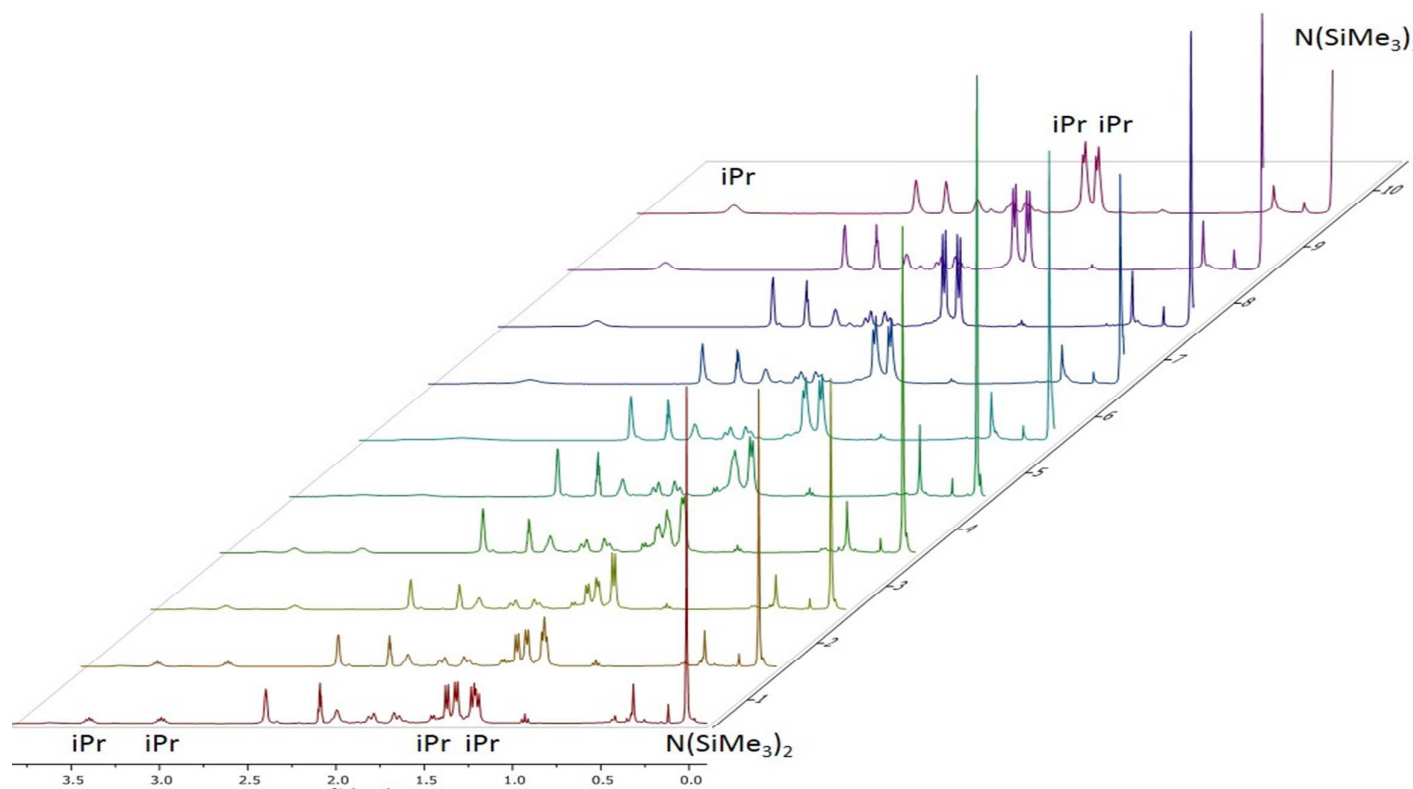

**Figure S21.** Stacked  $^1\text{H}$  spectra of  $\text{AdAm}^{\text{DIPP}}\text{CaN}(\text{SiMe}_3)_2$  measured from  $-30^\circ\text{C}$  to  $+80^\circ\text{C}$  (0-3.6 ppm).

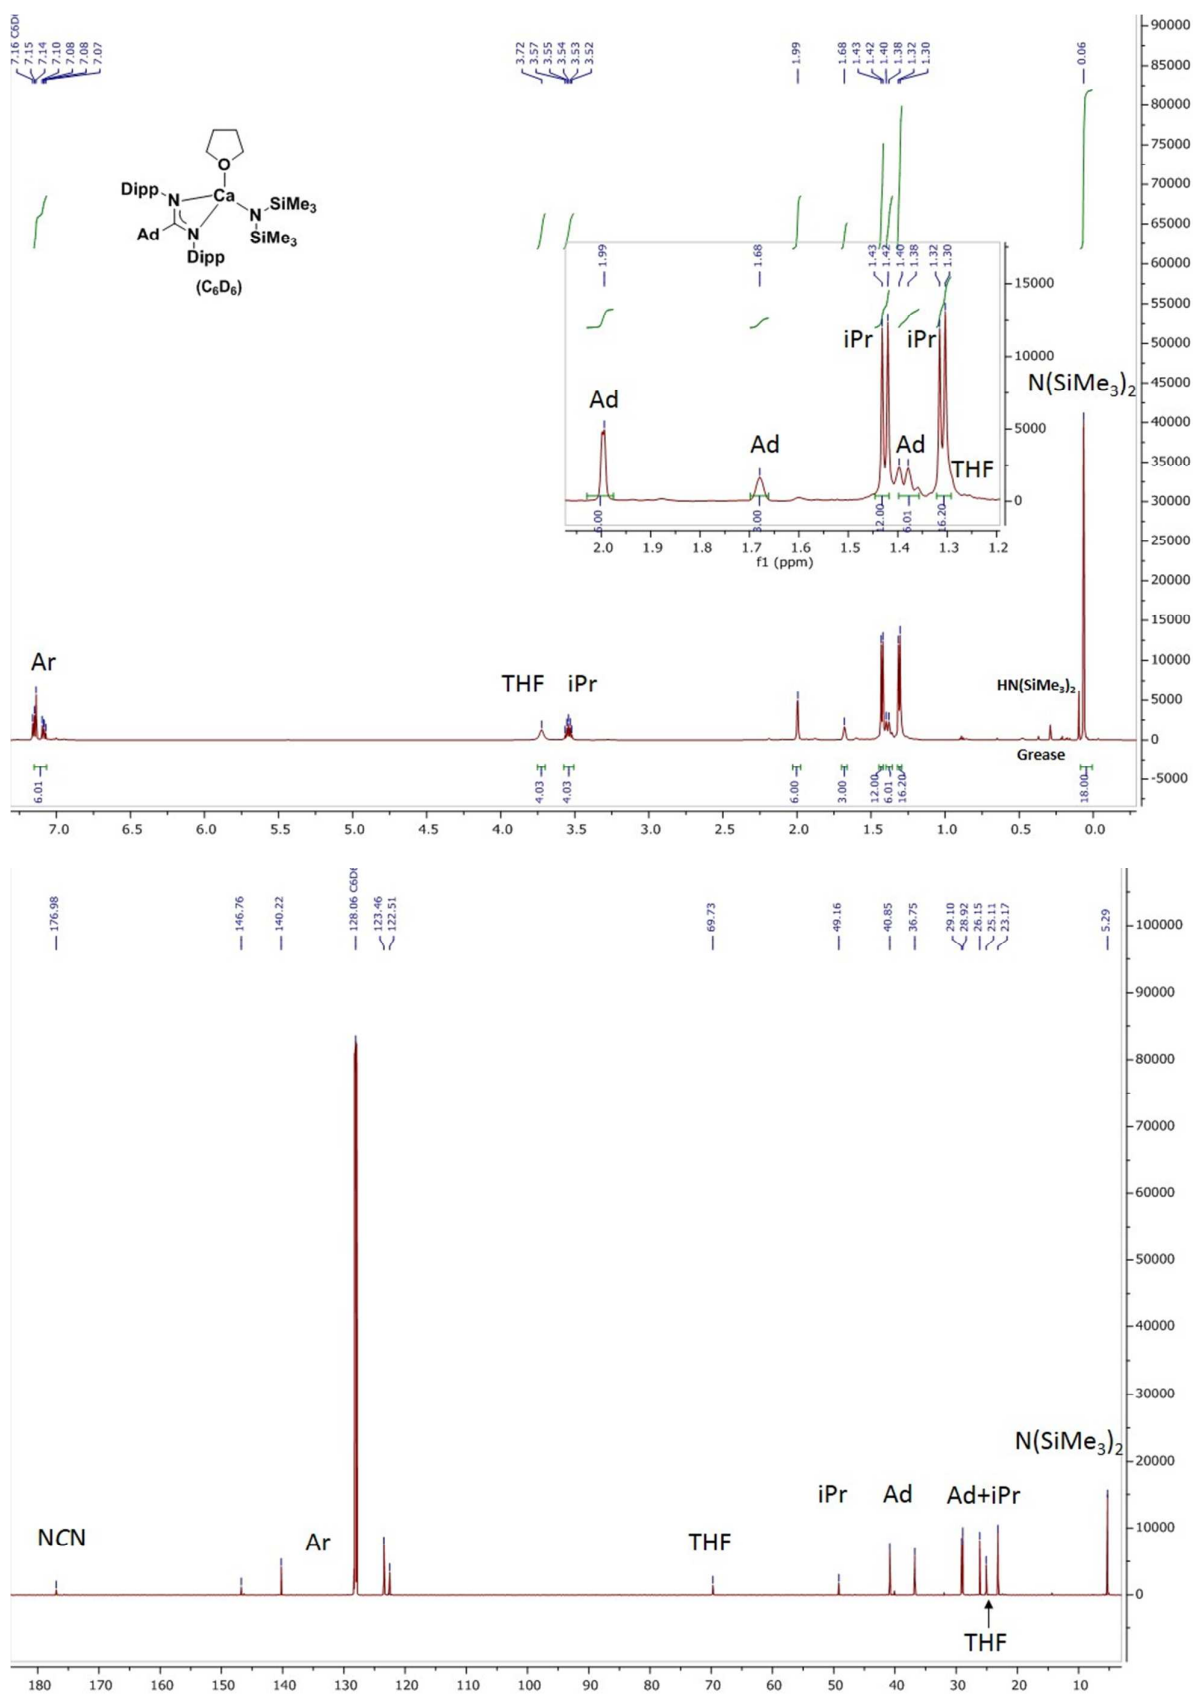

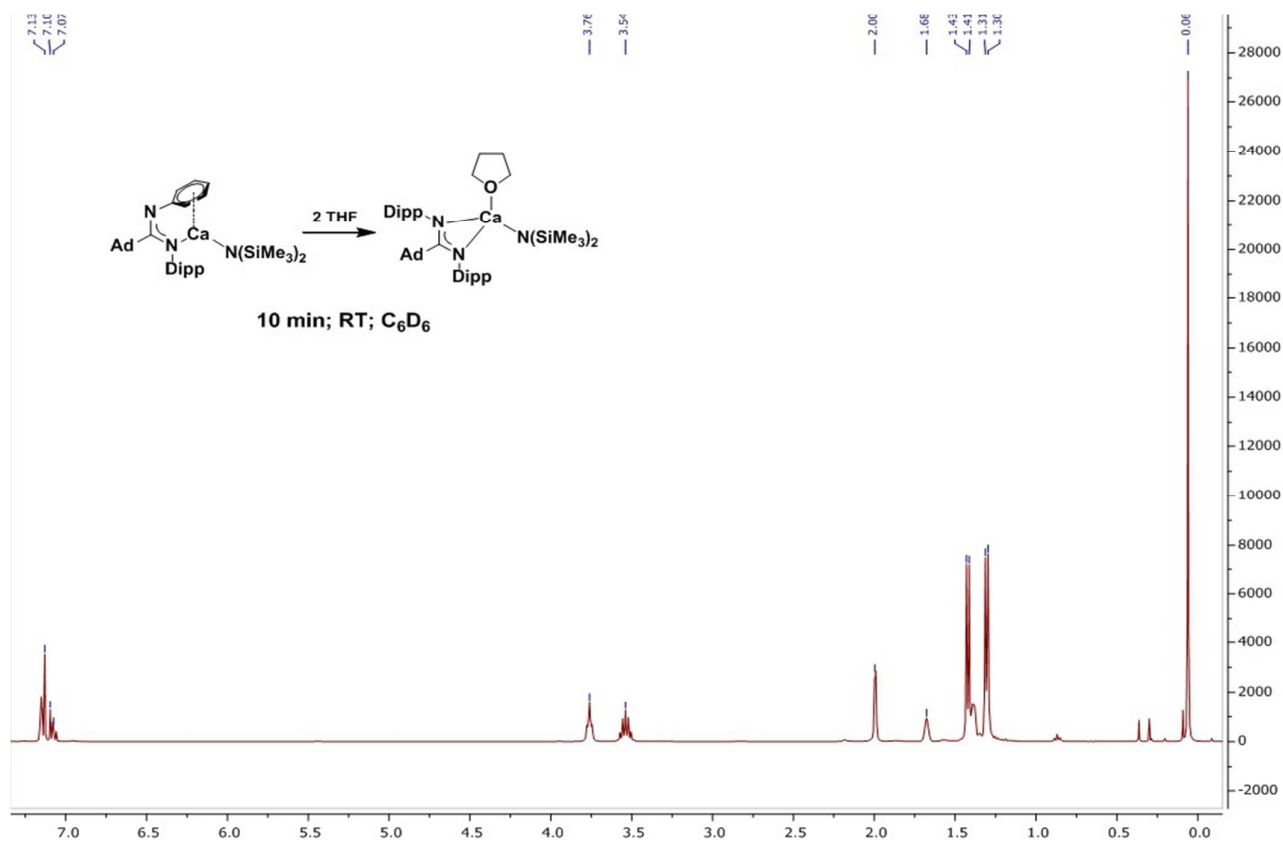

**Figure S23.** Reaction of  $\text{AdAm}^{\text{DIPP}}\text{CaN}(\text{SiMe}_3)_2$  with 2 equivalents of THF and formation of  $\text{AdAm}^{\text{DIPP}}\text{CaN}(\text{SiMe}_3)_2 \cdot \text{THF}$  in  $\text{C}_6\text{D}_6$ .

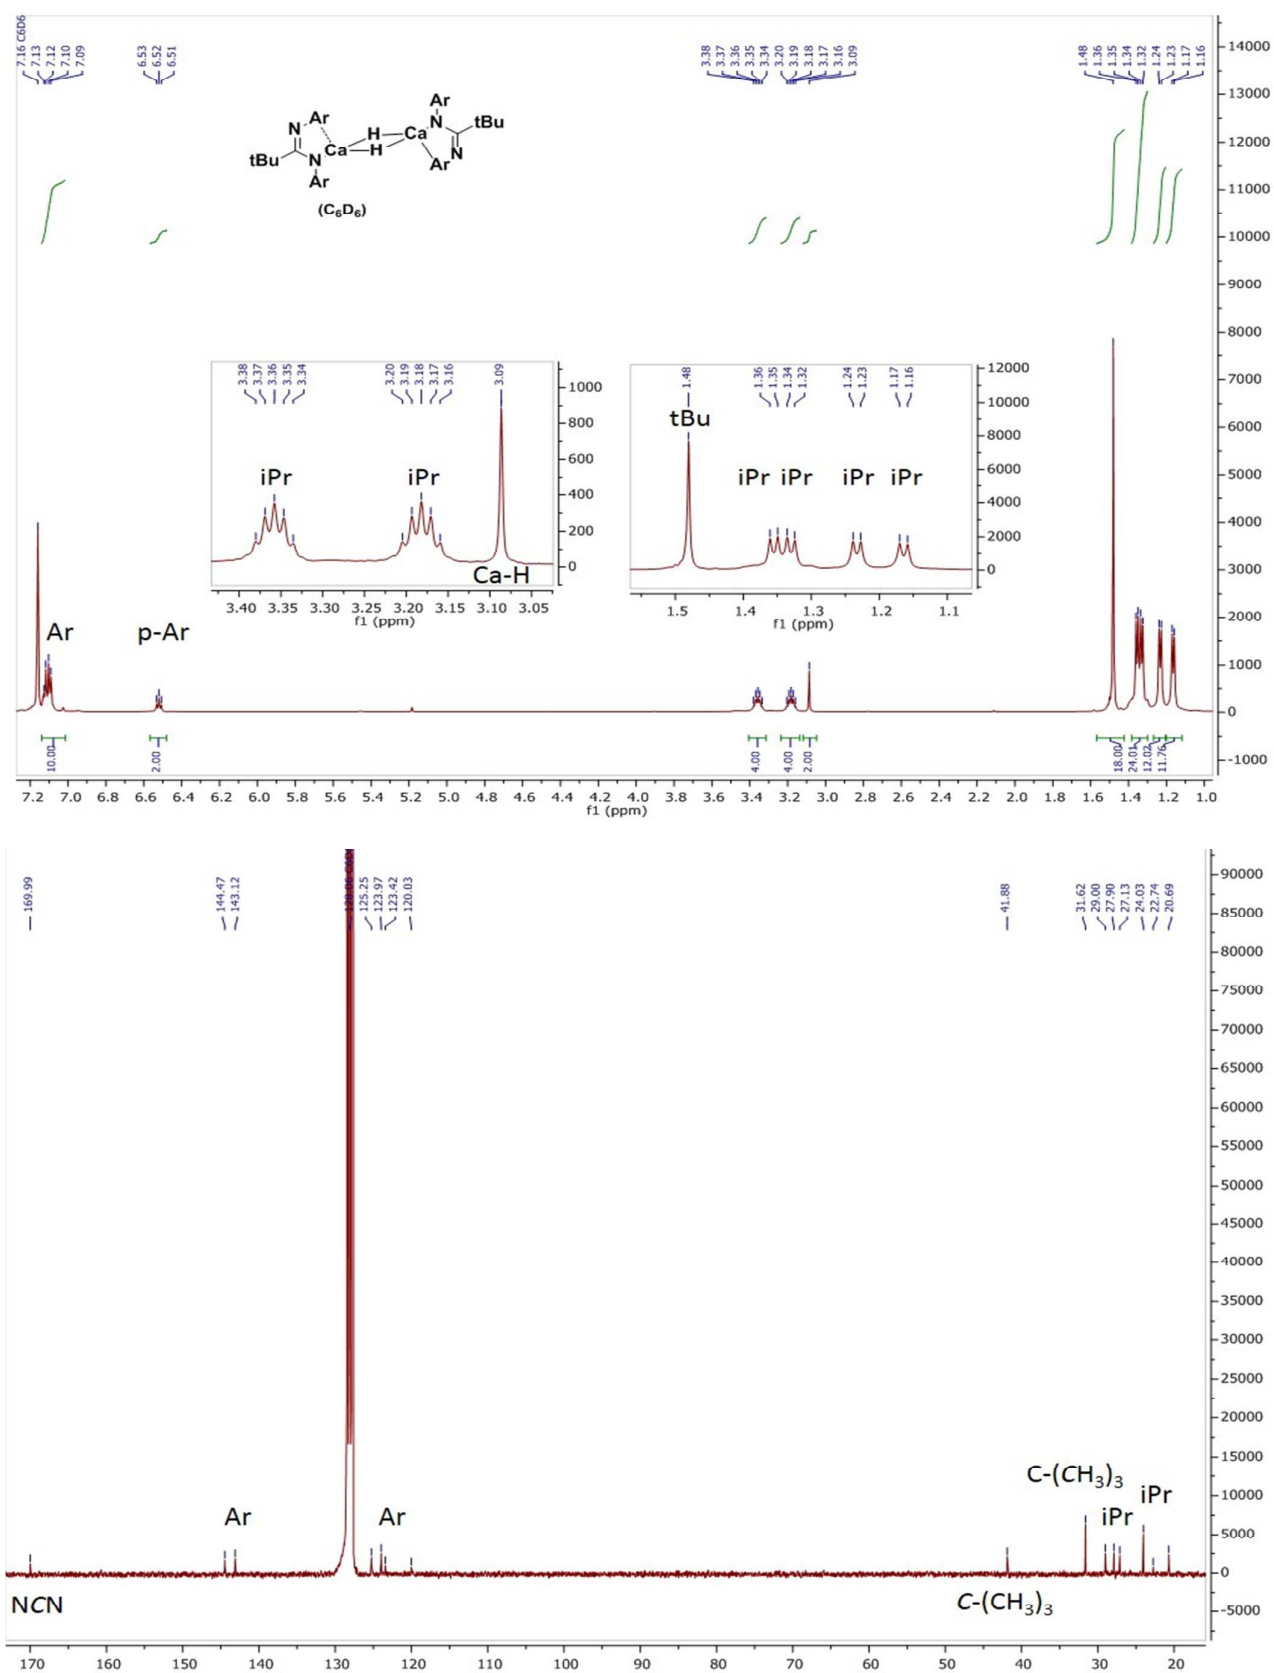

**Figure S24.**  $^1H$  and  $^{13}C$  spectra of  $(tBuAm^{DIPP}CaH)_2$  in  $C_6D_6$

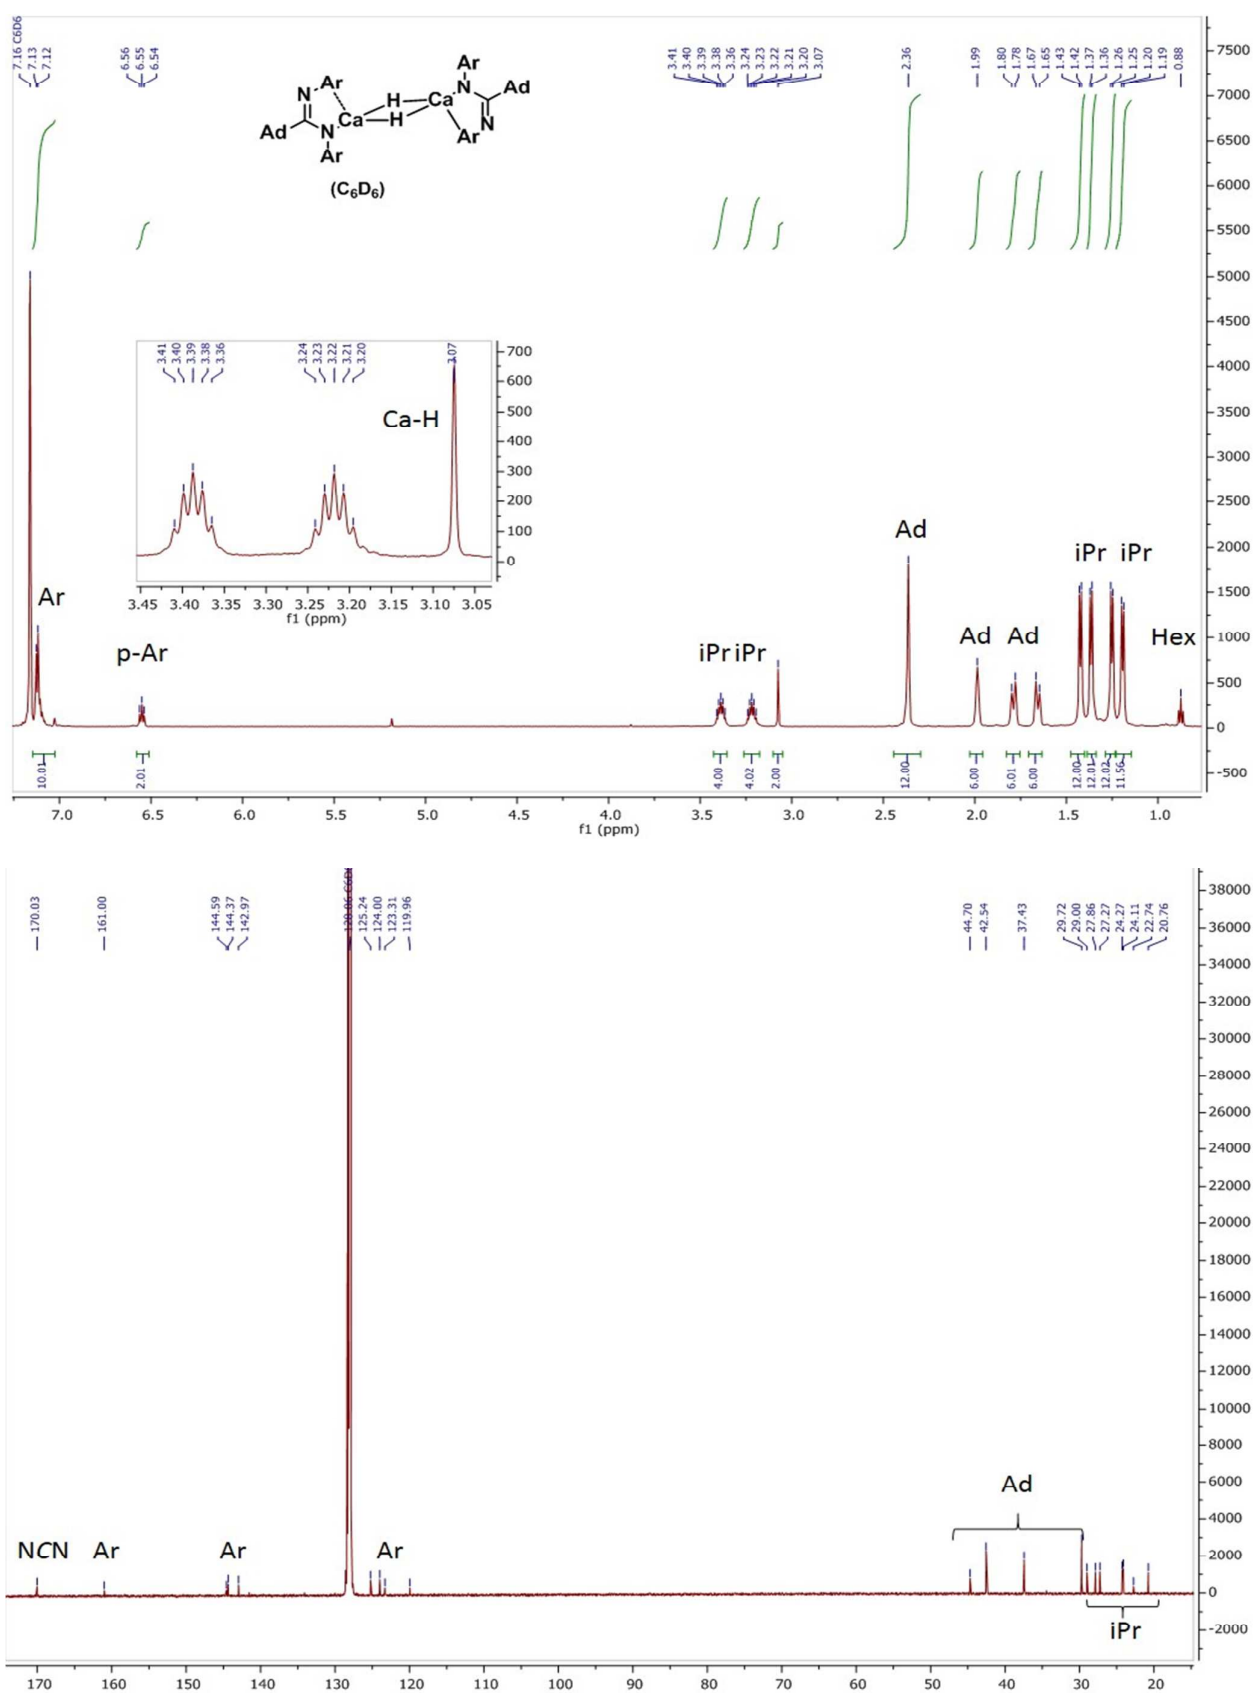

Figure S25.  $^1\text{H}$  and  $^{13}\text{C}$  spectra of  $(\text{AdAm}^{\text{DIPPCaH}})_2$  in  $\text{C}_6\text{D}_6$



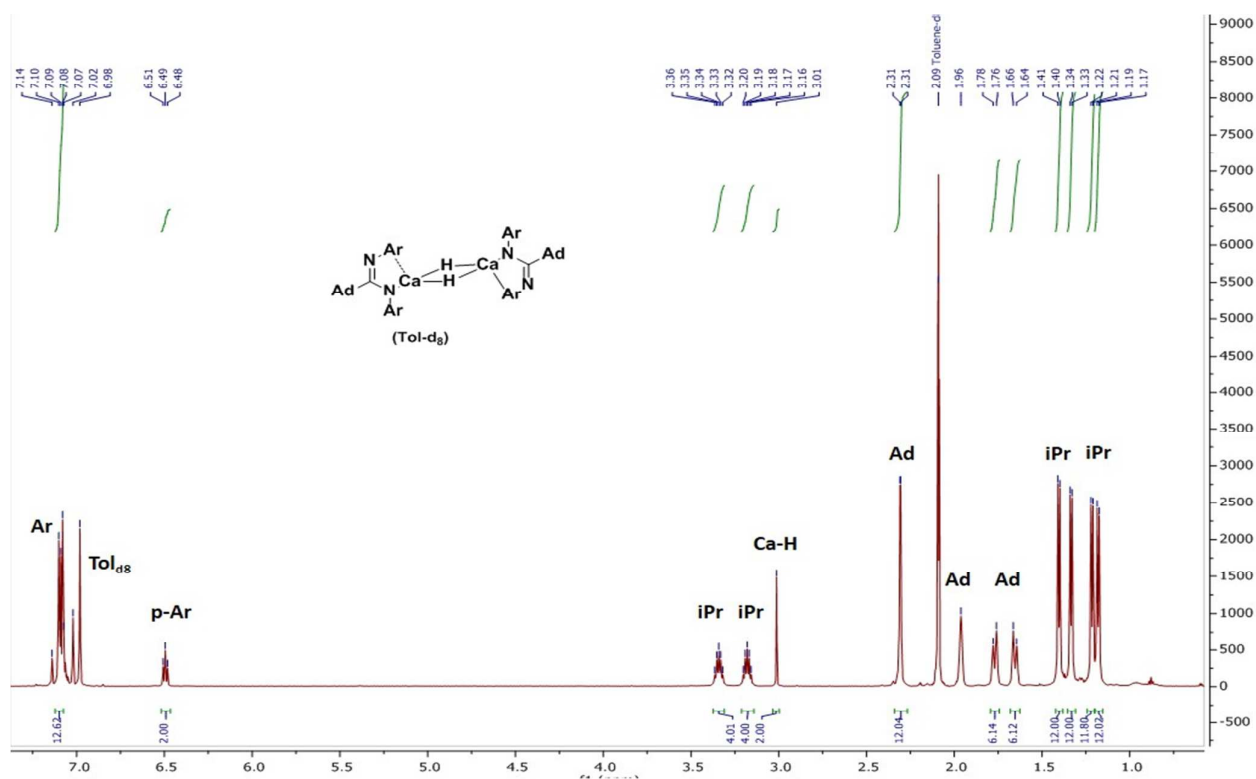

Figure S26. Spectrum of  $(\text{AdAm}^{\text{DIPP}}\text{CaH})_2$  in toluene- $d_8$

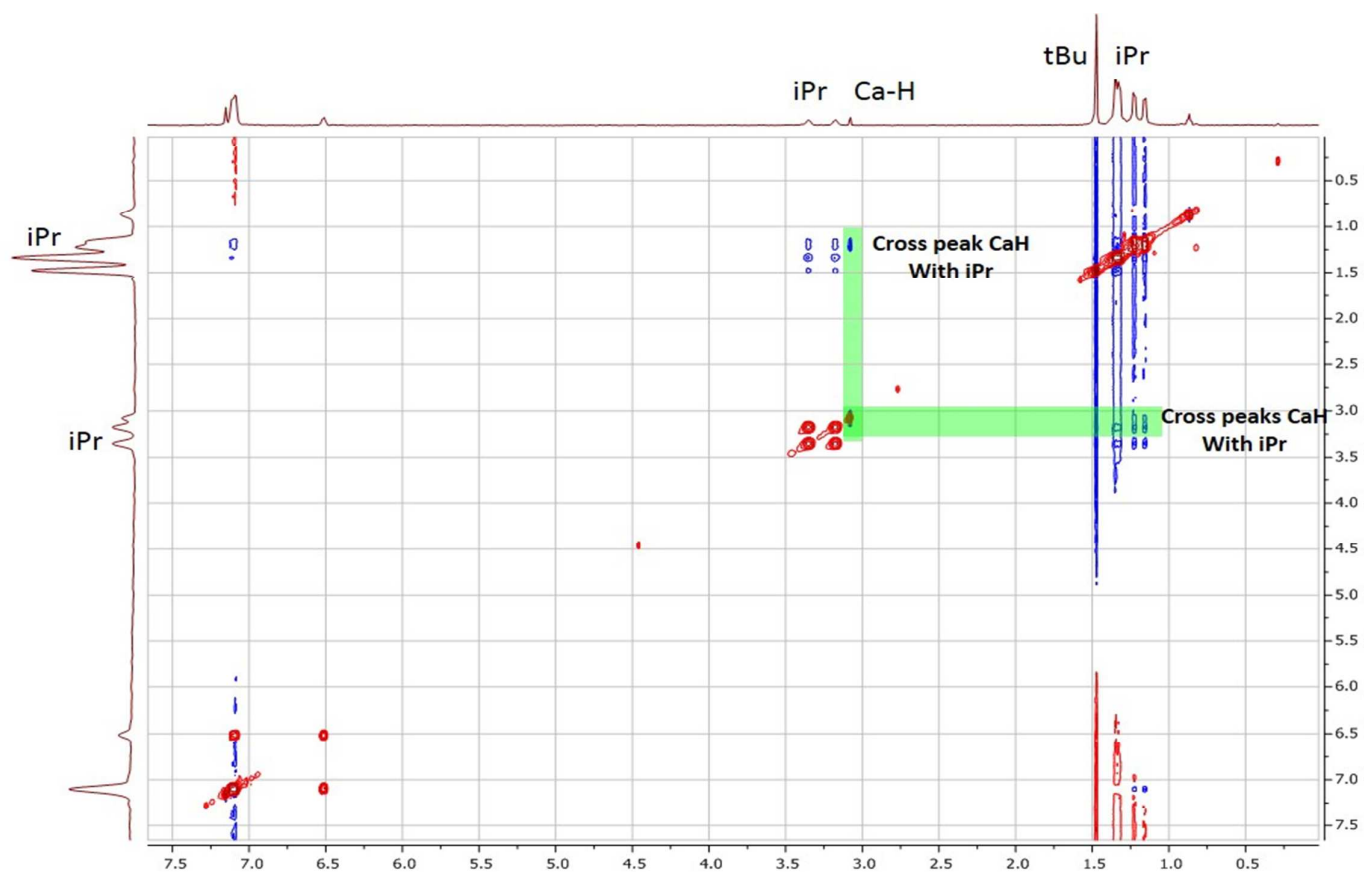

Figure S27. 2D-NOESY spectrum of  $(\text{tBuAm}^{\text{DIPP}}\text{CaH})_2$  in  $\text{C}_6\text{D}_6$

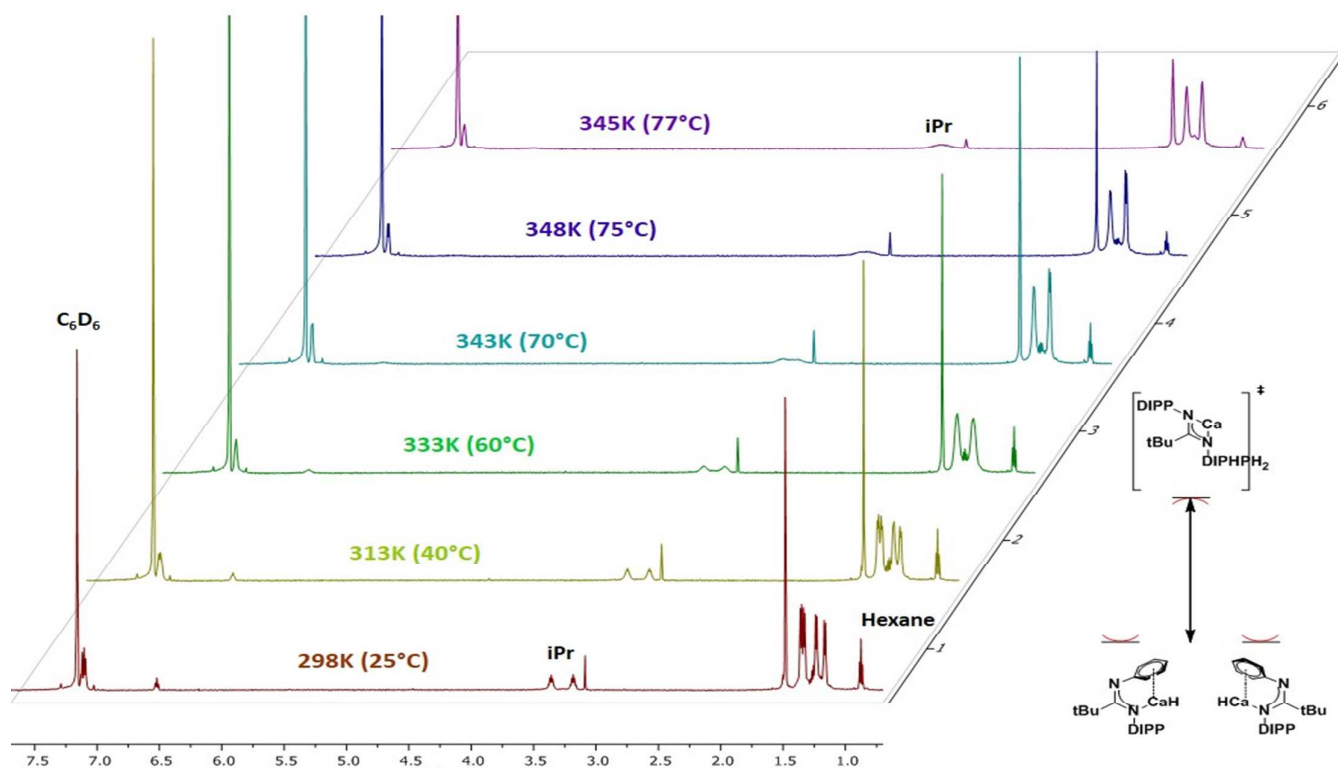

Figure S28. Coalescence of  $(t\text{BuAm}^{\text{DIPP}}\text{CaH})_2$  reached at 77°C in  $\text{C}_6\text{D}_6$

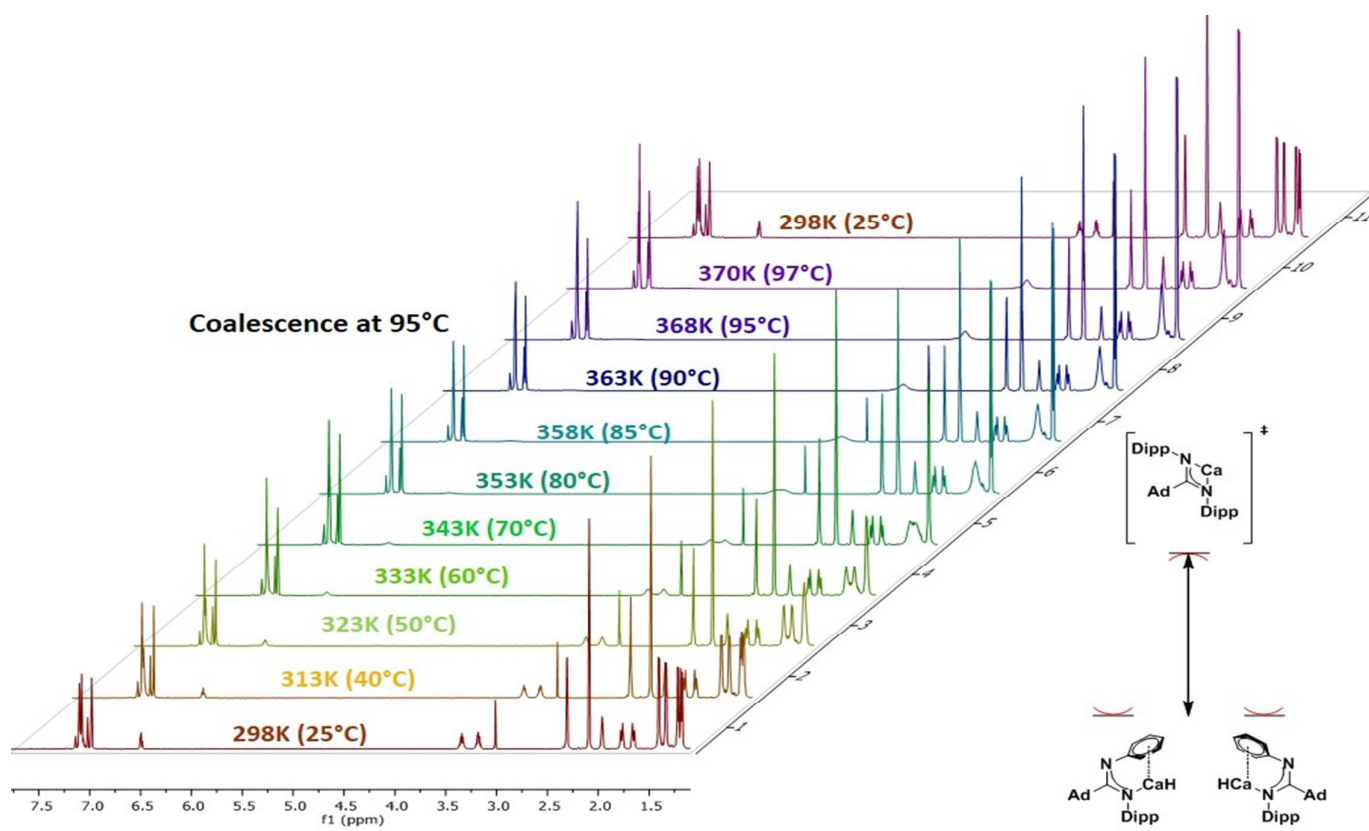

Figure S29. Coalescence of  $(\text{AdAm}^{\text{DIPP}}\text{CaH})_2$  reached at 95°C in  $\text{toluene-}d_8$ .

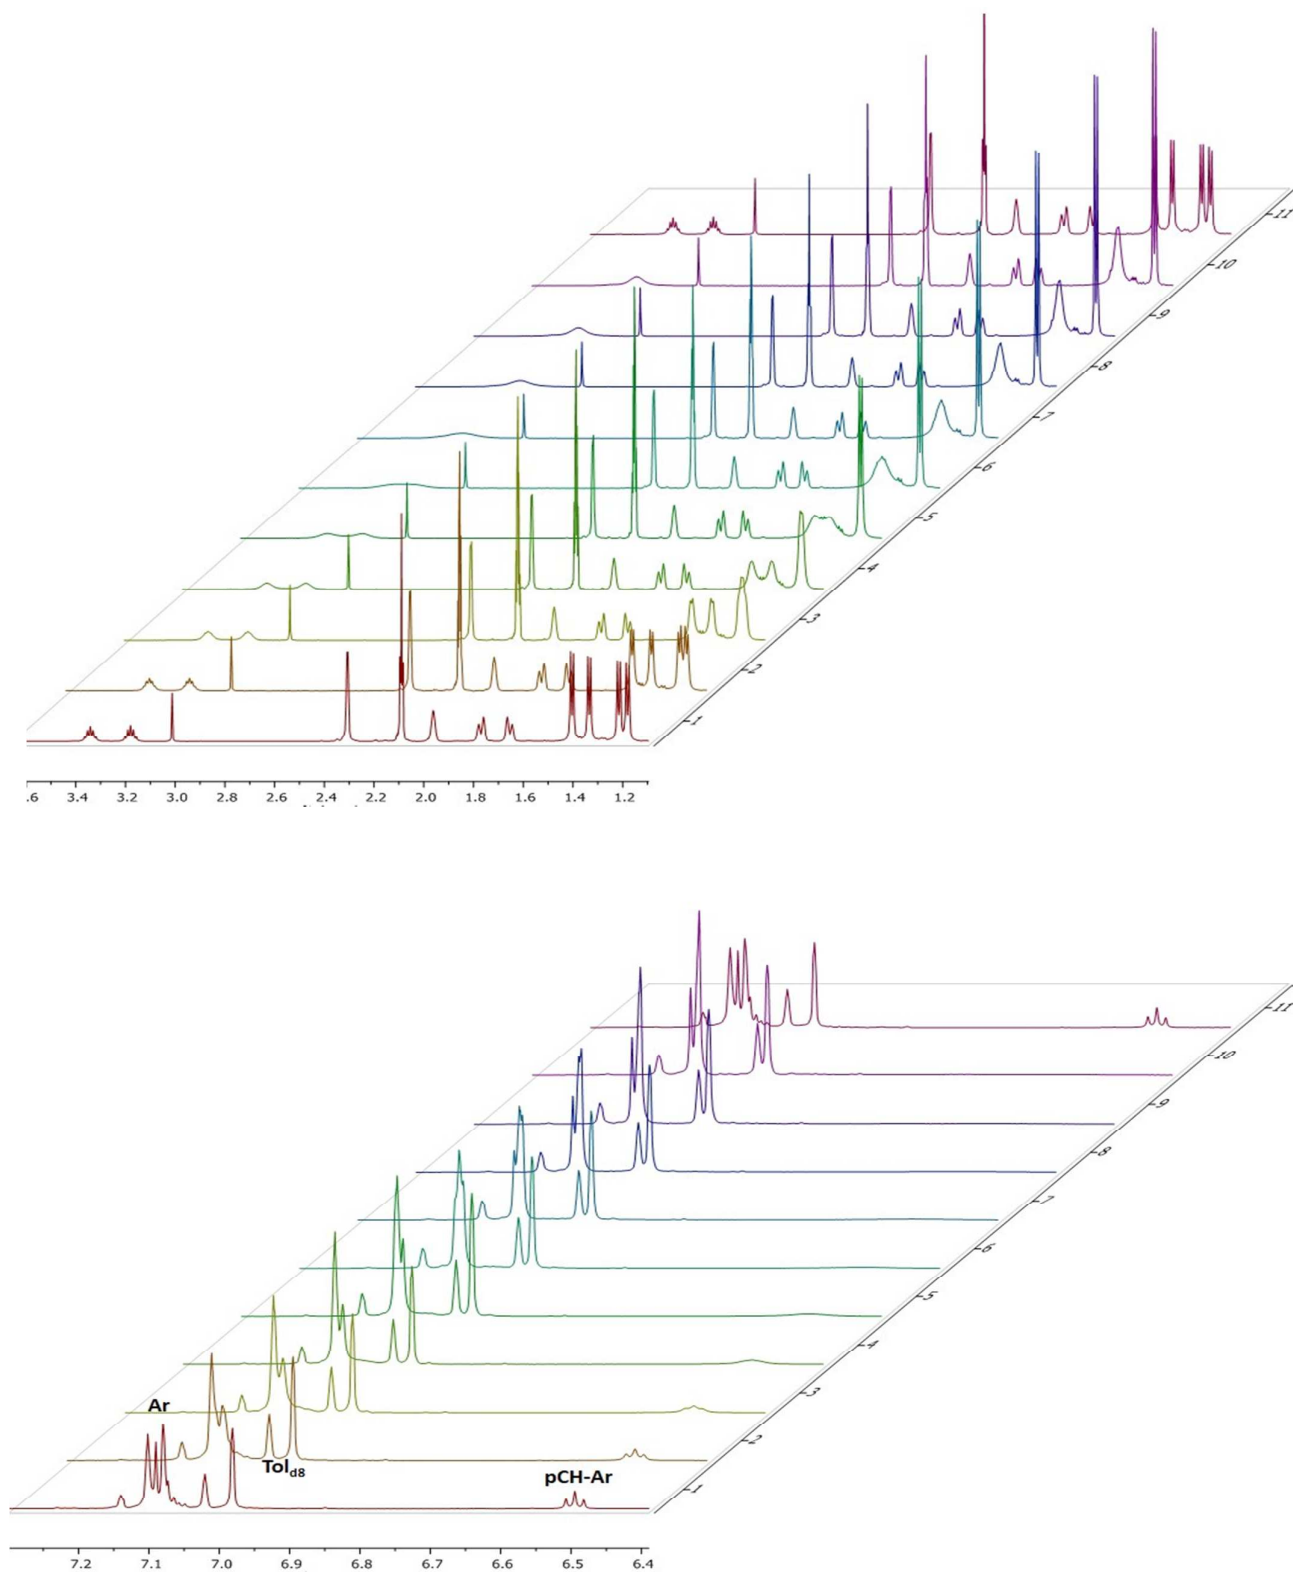

**Figure S30.** Coalescence of  $(\text{AdAm}^{\text{DIPP}}\text{CaH})_2$  in  $\text{toluene-}d_8$ . Zoom in the iPr region and Ar region respectively shown

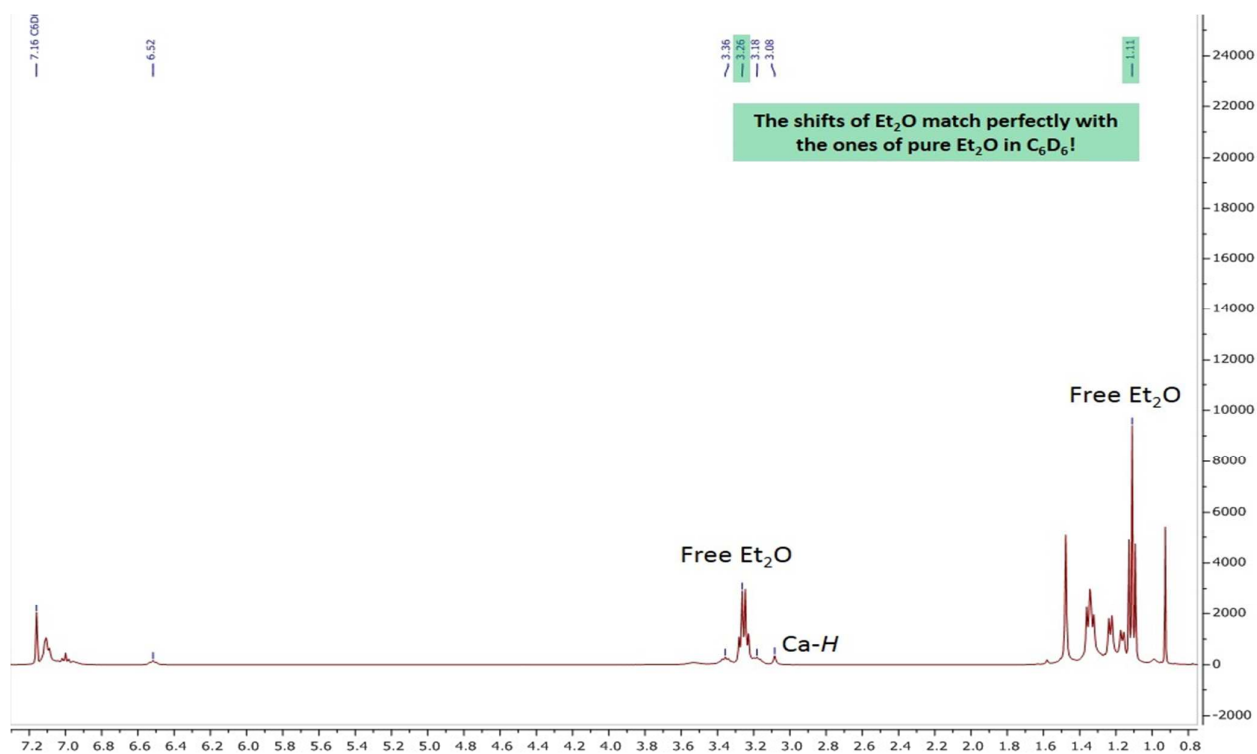

**Figure S31.** Spectrum of (tBuAm<sup>DIPP</sup>CaH)<sub>3</sub>·(Et<sub>2</sub>O)<sub>2</sub> in C<sub>6</sub>D<sub>6</sub>: broad signals match with those for dimeric (tBuAm<sup>DIPP</sup>CaH)<sub>2</sub> and free Et<sub>2</sub>O can be seen.

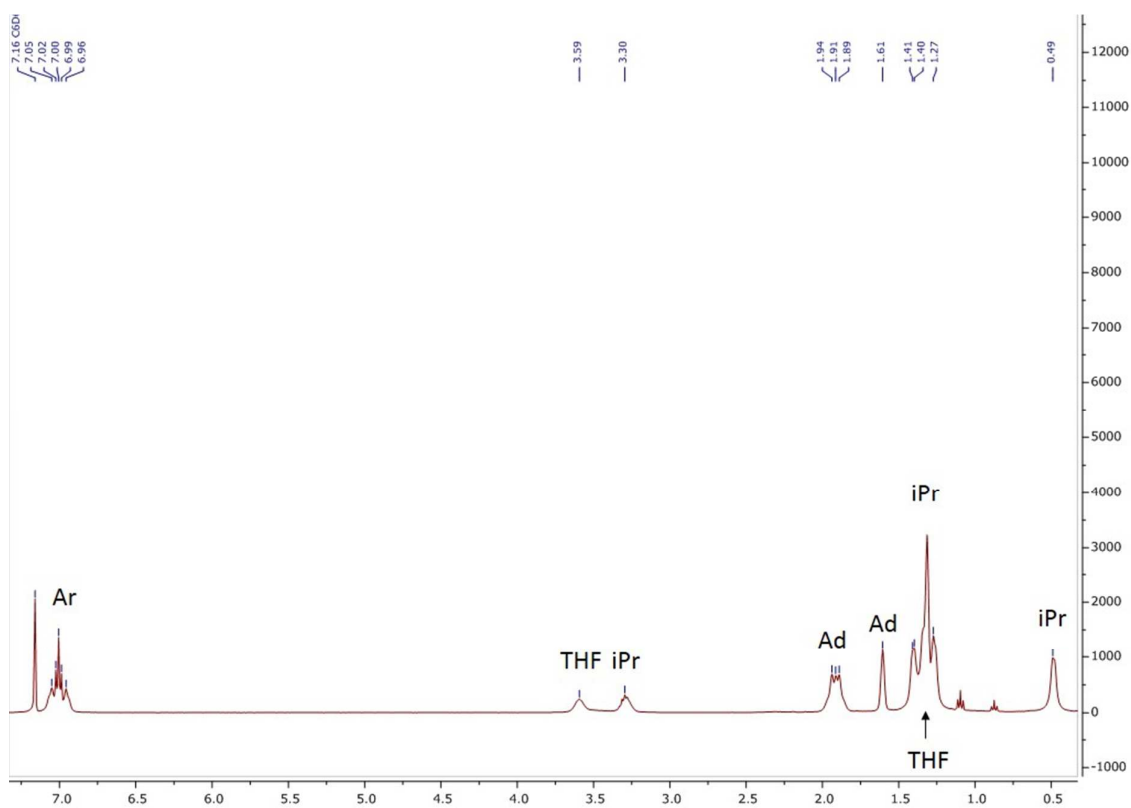

**Figure S32.** Spectrum of the decomposition products of (AdAm<sup>DIPP</sup>CaH)<sub>3</sub>·(THF)<sub>2</sub> in C<sub>6</sub>D<sub>6</sub>. The only one detectable is the homoleptic compound.

## References

1. Dolomanov, O.V., Bourhis, L.J., Gildea, R.J., Howard, J.A.K.; Puschmann, H. (2009), *J. Appl. Cryst.* 42, 339-341.
2. Sheldrick, G.M. (2015). *Acta Cryst.* A71, 3-8.
3. Sheldrick, G.M. (2008). *Acta Cryst.* A64, 112-122.
4. Thorn, Dittrich & Sheldrick, *Acta Cryst.* A68 (2012) 448-451.
5. *Acta Cryst.* D61, 2005, 1299-1301.
